# Supplementary material for: Benz-amidinato calcium iodide catalyzed aldehyde and ketone hydroboration with unprecedented functional group tolerance
Source: Royal Society of Chemistry journal article supplement (doi:10.1039/c7cc02311a), 2017-01-01
Supplement: c7cc02311a1.pdf [file c7cc02311a1.pdf]

## Supplementary Information

*for*

# **Benz-amidinato calcium iodide catalyzed aldehyde and ketone hydroboration with unprecedented functional group tolerance**

Sandeep Yadav, Sanjukta Pahar and Sakya S. Sen\*

### **Contents:**

1. General consideration.
2. General Procedure for Catalytic Hydroboration of Aldehydes.
3. Solvent Screening.
4. Spectroscopic data for aldehyde hydroboration products.
5. TON and TOF table for aldehyde hydroboration.
6. General Procedure for Catalytic Hydroboration of Ketone.
7. Spectroscopic data for ketone hydroboration products.
8. TON and TOF table for ketone hydroboration.
9. NMR spectra.
10. Chemoselective hydroboration of aldehydes versus ketones.
11. References.

- 1. General consideration :** All reactions were operated under argon atmosphere using glovebox and Schlenk line. Dried solvents were used directly from M-Braun solvent purification system MB SPS-800.  $\text{CDCl}_3$  was degassed by repeated freeze-thaw cycles and stored over activated 4 Å molecular sieves.  $^1\text{H}$  and  $^{13}\text{C}$  NMR spectra were recorded in  $\text{CDCl}_3$  at room temperature using a Bruker Advance DPX 200 spectrophotometer. NMR chemical shifts were reported in ppm with respect to tetramethylsilane. Chemicals were purchased from Sigma-Aldrich, Alfa-aesar, TCI chemicals and used without further purification. Compound **1** was prepared according to the literature procedure.<sup>1</sup>
- 2. General Procedure for Catalytic Hydroboration of Aldehydes :** Aldehyde (0.25 mmol), pinacolborane (0.25mmol),  $\text{LCaI}$  (0.5-2 mol%) [benzene (1ml)] were charged in Schlenk tube inside glove box. The reaction mixture was allowed to run at room temperature. The progress of the reaction was monitored by  $^1\text{H}$  NMR, which indicated the completion of the reaction by the disappearance of the aldehyde proton and appearance of a new  $\text{CH}_2$  peak. Upon completion of reaction, the solvent was removed using high vacuum in Schlenk line and mesitylene (0.25mmol) as internal standard, was added while making the NMR in  $\text{CDCl}_3$ .
- 3. Solvent Screening :** The reaction of benzaldehyde (0.25 mmol), pinacolborane(0.25mmol) was performed using different solvents as shown in table. The reaction conversion was found to be highest when we used benzene as reaction solvent.

**Table S1.**

| Entry | Cat. (mol%) | Solvent | Time (min) | Conversion (%) |
|-------|-------------|---------|------------|----------------|
| 1     | 2           | THF     | 40         | 94             |
| 2     | 2           | Hexane  | 40         | 90             |
| 3     | 2           | Xylene  | 40         | 96             |
| 4     | 2           | Toluene | 40         | 96             |
| 5     | 2           | Benzene | 40         | >99            |

#### 4. Spectroscopic data for aldehyde hydroboration products -

**PhCH<sub>2</sub>OBpin (2a):** product from hydroboration of benzaldehyde. <sup>1</sup>H NMR (CDCl<sub>3</sub>, 200 MHz),

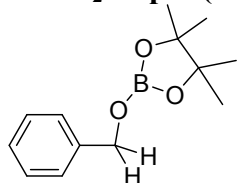

$\delta$  1.17 (s, 12 H, Bpin-CH<sub>3</sub>), 4.82 (s, 2H, pinBOCH<sub>2</sub>), 7.24 (m, 5H, Ar-H); <sup>13</sup>C NMR (CDCl<sub>3</sub>, 50.28 MHz),  $\delta$  24.68 (Bpin-CH<sub>3</sub>), 66.77 (OCH<sub>2</sub>Ph), 83.06 (Bpin-C), 126.82, 127.00, 128.37, 137.77, 139.31 (Ar-C)

**4-CH<sub>3</sub>PhCH<sub>2</sub>OBpin (2b):** product from hydroboration of 4-Methylbenzaldehyde. <sup>1</sup>H NMR (CDCl<sub>3</sub>,

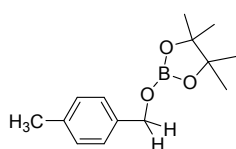

200 MHz),  $\delta$  1.17 (s, 12 H, Bpin-CH<sub>3</sub>), 2.25 (s, 3H, Ar-CH<sub>3</sub>), 4.80 (s, 2H, pinBOCH<sub>2</sub>), 7.07 (d, <sup>3</sup>J<sub>HH</sub> = 7.7 Hz, 2H, Ar-H), 7.14 (d, <sup>3</sup>J<sub>HH</sub> = 8.2 Hz, 2H, Ar-H); <sup>13</sup>C NMR (CDCl<sub>3</sub>, 50.28 MHz), 21.26 (PhCH<sub>3</sub>), 24.67 (Bpin-CH<sub>3</sub>), 66.66 (OCH<sub>2</sub>Ph), 82.96 (Bpin-C), 126.98, 129.02, 129.93, 137.05, 137.75 (Ar-C).

**2-BrPhCH<sub>2</sub>OBpin (2c):** product from hydroboration of 2-Bromobenzaldehyde. <sup>1</sup>H NMR (CDCl<sub>3</sub>,

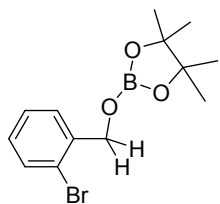

200 MHz),  $\delta$  1.19 (s, 12 H, Bpin-CH<sub>3</sub>), 4.90 (s, 2H, pinBOCH<sub>2</sub>), 7.03 (d, <sup>3</sup>J<sub>HH</sub> = 7.2 Hz, 1H, Ar-H), 7.27 (m, 1H, Ar-H), 7.40 (m, 1H, Ar-H), 7.44 (dd, <sup>3</sup>J<sub>HH</sub> = 7.1 Hz, 1H, Ar-H); <sup>13</sup>C NMR (CDCl<sub>3</sub>, 50.28 MHz) 24.66 (Bpin-CH<sub>3</sub>), 66.37 (OCH<sub>2</sub>Ph), 83.23 (Bpin-C), 126.97, 127.41, 127.88, 128.68, 132.32 (Ar-C).

**3-BrPhCH<sub>2</sub>OBpin (2d):** product from hydroboration of 3-Bromobenzaldehyde. <sup>1</sup>H NMR (CDCl<sub>3</sub>,

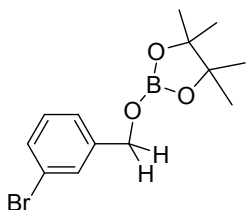

200 MHz),  $\delta$  1.17 (s, 12 H, Bpin-CH<sub>3</sub>), 4.80 (s, 2H, pinBOCH<sub>2</sub>), 7.08 (d, <sup>3</sup>J<sub>HH</sub> = 7.6 Hz, 1H, Ar-H), 7.14 (m, 1H, Ar-H), 7.26 (m, 1H, Ar-H), 7.43 (s, 1H, Ar-H); <sup>13</sup>C NMR (CDCl<sub>3</sub>, 50.28 MHz) 24.67 (Bpin-CH<sub>3</sub>), 65.91 (OCH<sub>2</sub>Ph), 83.23 (Bpin-C), 122.53, 125.22, 126.99, 128.40, 130.50 (Ar-C).

**4-BrPhCH<sub>2</sub>OBpin (2e):** product from hydroboration of 4-Bromobenzaldehyde. <sup>1</sup>H NMR (CDCl<sub>3</sub>,

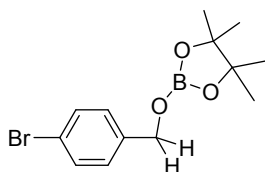

200 MHz),  $\delta$  1.17 (s, 12 H, Bpin-CH<sub>3</sub>), 4.78 (s, 2H, pinBOCH<sub>2</sub>), 7.15 (d, <sup>3</sup>J<sub>HH</sub> = 8.1 Hz, 2H, Ar-H), 7.34 (d, <sup>3</sup>J<sub>HH</sub> = 8.5 Hz, 2H, Ar-H); <sup>13</sup>C NMR 23.86 (Bpin-

CH<sub>3</sub>), 65.23 (OCH<sub>2</sub>Ph), 82.37 (Bpin-C), 120.48, 126.18, 128.68, 130.64, 136.94 (Ar-C).

**2-OCH<sub>3</sub>PhCH<sub>2</sub>OBpin (2f):** product from hydroboration of 2-Methoxybenzaldehyde. <sup>1</sup>H NMR

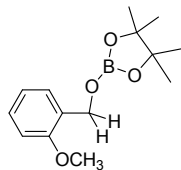

(CDCl<sub>3</sub>, 200 MHz), δ 1.18 (s, 12 H, Bpin-CH<sub>3</sub>), 3.70 (s, 3H, Ar-OCH<sub>3</sub>), 4.90 (s, 2H, pinBOCH<sub>2</sub>), 6.89 (m, 2H, Ar-H), 7.14 (m, 1H, Ar-H), 7.34 (m, 1H, Ar-H); <sup>13</sup>C NMR (CDCl<sub>3</sub>, 50.28 MHz), 24.50 (Bpin-CH<sub>3</sub>), 55.03 (PhOCH<sub>3</sub>), 62.17 (OCH<sub>2</sub>Ph), 82.72 (Bpin-C), 120.21, 127.22, 128.12, 137.58, 156.38 (Ar-C).

**3-OCH<sub>3</sub>PhCH<sub>2</sub>OBpin (2g):** product from hydroboration of 3-Methoxybenzaldehyde. <sup>1</sup>H NMR

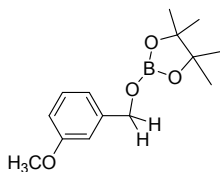

(CDCl<sub>3</sub>, 200 MHz), δ 1.18 (s, 12 H, Bpin-CH<sub>3</sub>), 3.70 (s, 3H, PhOCH<sub>3</sub>), 4.82 (s, 2H, pinBOCH<sub>2</sub>), 6.84 (d, 2H, Ar-H, J = 15.2 Hz), 7.11 (m, 2H, Ar-H); <sup>13</sup>C NMR (CDCl<sub>3</sub>, 50.28 MHz) 25.07 (Bpin-CH<sub>3</sub>), 65.81 (OCH<sub>2</sub>Ph), 83.48 (Bpin-C), 126.99, 129.06, 129.65, 131.81, 137.48 (Ar-C), 153.42 (PhOCH<sub>3</sub>).

**4-OHPhCH<sub>2</sub>OBpin (2h):** product from hydroboration of 4-Hydroxybenzaldehyde. <sup>1</sup>H NMR

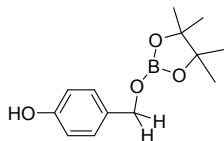

(CDCl<sub>3</sub>, 200 MHz), δ 1.18 (s, 12 H, Bpin-CH<sub>3</sub>), 4.75 (s, 2H, pinBOCH<sub>2</sub>), 6.77 (d, <sup>3</sup>J<sub>HH</sub> = 8.4 Hz, 2H, Ar-H), 7.07 (d, <sup>3</sup>J<sub>HH</sub> = 8.5 Hz, 2H, Ar-H); <sup>13</sup>C NMR (CDCl<sub>3</sub>, 50.28 MHz) 24.49 (Bpin-CH<sub>3</sub>), 66.54 (OCH<sub>2</sub>Ph), 83.09 (Bpin-C), 119.32, 128.68, 130.91, 137.64, 155.35 (Ar-C).

**2-OHPhCH<sub>2</sub>OBpin (2i):** product from hydroboration of 2-Hydroxybenzaldehyde. <sup>1</sup>H NMR

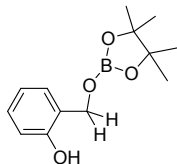

(CDCl<sub>3</sub>, 200 MHz), δ 1.18 (s, 12 H, Bpin-CH<sub>3</sub>), 4.88 (s, 2H, pinBOCH<sub>2</sub>), 6.87 (d, <sup>3</sup>J<sub>HH</sub> = 8.4 Hz, 2H, Ar-H), 7.07 (d, <sup>3</sup>J<sub>HH</sub> = 8.5 Hz, 2H, Ar-H); <sup>13</sup>C NMR (CDCl<sub>3</sub>, 50.28 MHz) 25.07 (Bpin-CH<sub>3</sub>), 72.54 (OCH<sub>2</sub>Ph), 83.42 (Bpin-C), 121.48, 128.86, 131.83, 138.21, 144.14 (Ar-C).

**4-NO<sub>2</sub>PhCH<sub>2</sub>OBpin (2j):** product from hydroboration of 4-Nitrobenzaldehyde. <sup>1</sup>H NMR (CDCl<sub>3</sub>,

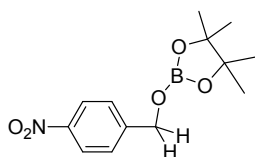

200 MHz),  $\delta$  1.19 (s, 12 H, Bpin-CH<sub>3</sub>), 4.93 (s, 2H, pinBOCH<sub>2</sub>), 7.43(d, <sup>3</sup>J<sub>HH</sub> = 8.6 Hz, 2H, Ar-H), 8.12(d, <sup>3</sup>J<sub>HH</sub> = 8.9 Hz, 2H, Ar-H); <sup>13</sup>C NMR ( CDCl<sub>3</sub>, 50.28 MHz) 24.63(Bpin-CH<sub>3</sub>), 65.59 (OCH<sub>2</sub>Ph), 83.43 (Bpin-C), 123.62, 126.93, 128.39, 130.49, 137.72(Ar-C).

**4-CNPhCH<sub>2</sub>OBpin (2k):** product from hydroboration of 4-Cyanobenzaldehyde. <sup>1</sup>H NMR (CDCl<sub>3</sub>,

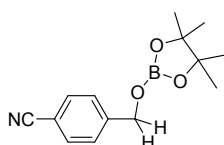

200 MHz),  $\delta$  1.19 (s, 12 H, Bpin-CH<sub>3</sub>), 4.89 (s, 2H, pinBOCH<sub>2</sub>), 7.37 (d, <sup>3</sup>J<sub>HH</sub> = 8.0 Hz, 2H, Ar-H), 7.51 (d, <sup>3</sup>J<sub>HH</sub> = 8.4 Hz, 2H, Ar-H); <sup>13</sup>C NMR ( CDCl<sub>3</sub>, 50.28 MHz), 21.71 (Bpin-CH<sub>3</sub>), 66.27 (OCH<sub>2</sub>Ph), 83.85 (Bpin-C), 111.60 (PhCN), 119.38, 128.85, 132.68, 138.20, 145.12 (Ar-C).

**4-FPhCH<sub>2</sub>OBpin (2l):** product from hydroboration of 4-Fluorobenzaldehyde. <sup>1</sup>H NMR (CDCl<sub>3</sub>,

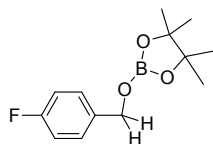

200 MHz),  $\delta$  1.17 (s, 12 H, Bpin-CH<sub>3</sub>), 4.79 (s, 2H, pinBOCH<sub>2</sub>), 6.92 (d, <sup>3</sup>J<sub>HH</sub> = 8.9 Hz, 2H, Ar-H), 7.22 (d, <sup>3</sup>J<sub>HH</sub> = 7.8 Hz, 2H, Ar-H); <sup>13</sup>C NMR ( CDCl<sub>3</sub>, 50.28 MHz) 24.62(Bpin-CH<sub>3</sub>), 66.12 (OCH<sub>2</sub>Ph), 83.10 (Bpin-C), 126.96, 128.77, 132.19, 135.08, 137.75(Ar-C).

**FurfuralOBpin (2m):** product from hydroboration of Furfural. <sup>1</sup>H NMR (CDCl<sub>3</sub>, 200 MHz),  $\delta$  1.18

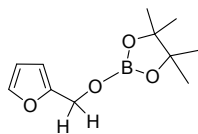

(s, 12 H, Bpin-CH<sub>3</sub>), 4.74 (s, 2H, pinBOCH<sub>2</sub>), 6.22(s, 1H, Ar-H), 6.72 (s, 2H, Ar-H); <sup>13</sup>C NMR ( CDCl<sub>3</sub>, 50.28 MHz), 23.54 (Bpin-CH<sub>3</sub>), 58.16 (OCH<sub>2</sub>Ph), 82.02 (Bpin-C), 125.87, 136.64, 141.40, 151.42, (Ar-C).

**2,6-MePhCH<sub>2</sub>OBpin (2n):** product from hydroboration of 2,6-Dimethylbenzaldehyde. <sup>1</sup>H NMR

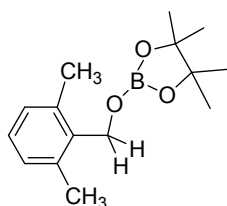

(CDCl<sub>3</sub>, 200 MHz),  $\delta$  1.17 (s, 12 H, Bpin-CH<sub>3</sub>), 2.34 (s, 6H, PhCH<sub>3</sub>), 4.91(s, 2H, pinBOCH<sub>2</sub>), 6.93(m, 3H, Ar-H); <sup>13</sup>C NMR ( CDCl<sub>3</sub>, 50.28 MHz), 19.42, 21.11(PhCH<sub>3</sub>), 24.52 (Bpin-CH<sub>3</sub>), 61.29 (OCH<sub>2</sub>Ph), 82.71 (Bpin-C), 128.05, 134.94, 137.60 (Ar-C).

**PhC<sub>3</sub>H<sub>4</sub>OBpin (2o):** product from hydroboration of trans-Cinnamaldehyde. <sup>1</sup>H NMR (CDCl<sub>3</sub>, 200

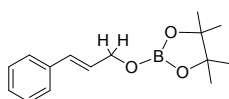

MHz),  $\delta$  1.19 (s, 12 H, Bpin-CH<sub>3</sub>), 4.45 (d, 2H, <sup>3</sup>J=5.2 Hz, CH<sub>2</sub>), 6.14-6.24 (m,

1H, CHCH), 6.50-6.58 (d, 1H,  $^3J=15.7$  Hz, ArCH), 7.22 (m, 5H, Ar-H);  $^{13}C$  NMR (CDCl<sub>3</sub>, 50.28 MHz) 21.10(Bpin-CH<sub>3</sub>), 65.18 (OCH<sub>2</sub>Ph), 82.82 (Bpin-C), 126.35 (PhCHCH), 127.41, 128.43, 130.55, 136.78, 137.59 (Ar-C).

**C<sub>6</sub>H<sub>5</sub>PhOBpin (2p):** product from hydroboration of Naphthaldehyde.  $^1H$  NMR (CDCl<sub>3</sub>, 200 MHz),  $\delta$

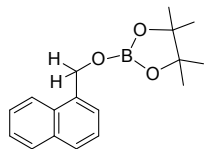

1.19 (s, 12 H, Bpin-CH<sub>3</sub>), 5.32 (s, 2H, pinBOCH<sub>2</sub>), 7.39 (m, 4H, Ar-H), 7.67 (m, 2H, Ar-H), 7.93 (m, 1H, Ar-H);  $^{13}C$  NMR (CDCl<sub>3</sub>, 50.28 MHz) 25.20(Bpin-CH<sub>3</sub>), 65.58(OCH<sub>2</sub>Ph), 83.58 (Bpin-C), 124.03, 125.42, 125.91, 126.22, 126.66, 128.73, 129.11, 131.52, 134.13, 135.22, 138.26 (Ar-C).

#### 5. Table S2 :TON and TOF table for aldehyde hydroboration.

| Entry | Substrate | Time (min) | Catalyst Mol% | Yield (NMR) | TON | TOF[h <sup>-1</sup> ] |
|-------|-----------|------------|---------------|-------------|-----|-----------------------|
| 2a    |           | 40 min     | 0.5           | 83 %        | 166 | 249                   |
| 2b    |           | 40 min     | 1             | 81 %        | 81  | 121.5                 |
| 2c    |           | 40 min     | 2             | 96 %        | 48  | 72                    |

|    |                                                                                     |        |   |      |       |       |
|----|-------------------------------------------------------------------------------------|--------|---|------|-------|-------|
| 2d | 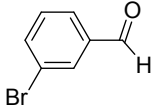   | 40 min | 3 | 95 % | 47.5  | 71.25 |
| 2e |    | 40min  | 2 | 81 % | 40.50 | 60.75 |
| 2f |    | 40 min | 2 | 83 % | 41    | 62    |
| 2g |   | 40 min | 2 | 76%  | 38    | 57    |
| 2h |  | 40 min | 2 | 79 % | 40    | 60    |
| 2i |  | 40 min | 2 | 71 % | 35.5  | 53.25 |
| 2j |  | 40 min | 2 | 97 % | 48.5  | 72.75 |

|    |                                                                                     |        |   |      |    |     |
|----|-------------------------------------------------------------------------------------|--------|---|------|----|-----|
| 2k | 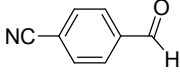   | 40 min | 2 | 80 % | 40 | 60  |
| 2l |    | 40 min | 2 | 82%  | 41 | 62  |
| 2m |    | 40 min | 2 | 72 % | 36 | 54  |
| 2n |  | 40 min | 1 | 95 % | 94 | 142 |
| 2o |  | 40 min | 2 | 91 % | 46 | 69  |
| 2p |  | 40 min | 2 | 83 % | 42 | 63  |



## 6. General Procedure for Catalytic Hydroboration of Ketone:

Ketone (0.25 mmol), pinacolborane (0.25mmol), LCaI (3mol%) [benzene (1ml)] were charged in Schlenk tube inside glove box. The reaction mixture was allowed to run at room temperature. The progress of the reaction was monitored by  $^1\text{H}$  NMR, which indicated the completion of the reaction by the appearance of a new CH peak. Upon completion of reaction, the solvent was removed using high vacuum in Schlenk line and mesitylene as internal standard, (0.25mmol) was added while making the NMR in  $\text{CDCl}_3$ .

## 7. Spectroscopic data for ketone hydroboration products:

**(Ph)(Me)CHOBpin (3a):** product from hydroboration of acetophenone.  $^1\text{H}$  NMR ( $\text{CDCl}_3$ , 200

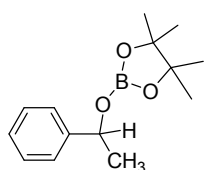

MHz),  $\delta$  1.13 (s, 6 H, Bpin- $\text{CH}_3$ ), 1.16 (s, 6H, Ar- $\text{CH}_3$ ), 1.40 (d,  $^3J_{\text{HH}} = 6.3$  Hz, 3H, OCH $\text{CH}_3$ ), 5.18 (q, 1H, pinBOCH), 7.17 (m, 5H, Ar- $\text{H}$ );  $^{13}\text{C}$  NMR ( $\text{CDCl}_3$ , 50.28 MHz), 21.10 (Bpin- $\text{CH}_3$ ), 72.51 (OCH $_2$ Ph), 82.66 (Bpin-C), 125.25, 127.0, 128.11, 137.60, 144.49 (Ar-C).

**(4- $\text{CH}_3$ Ph)(Me)CHOBpin (3b):** product from hydroboration of 4-Methylacetophenone.  $^1\text{H}$  NMR

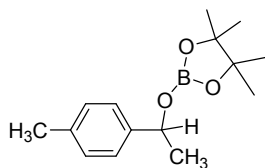

( $\text{CDCl}_3$ , 200 MHz),  $\delta$  1.13 (s, 6 H, Bpin- $\text{CH}_3$ ), 1.16 (s, 6H, Ar- $\text{CH}_3$ ), 1.38 (d,  $^3J_{\text{HH}} = 6.3$  Hz, 3H, OCH $\text{CH}_3$ ), 2.24 (s, 3H, Ph $\text{CH}_3$ ), 5.16 (q, 1H, pinBOCH), 7.01 (d,  $^3J_{\text{HH}} = 7.4$  Hz, 2H, Ar- $\text{H}$ ), 7.16 (d,  $^3J_{\text{HH}} = 8.6$  Hz, 2H, Ar- $\text{H}$ );  $^{13}\text{C}$  NMR ( $\text{CDCl}_3$ , 50.28 MHz), 21.24 (Ph $\text{CH}_3$ ), 24.57 (Bpin- $\text{CH}_3$ ), 25.97 (OCH $\text{CH}_3$ ), 72.49 (OCH $_2$ Ph), 83.14 (Bpin-C), 126.96, 128.39, 130.77, 137.75, 145.48 (Ar-C).

**(4-O $\text{CH}_3$ Ph)(Me)CHOBpin (3c):** product from hydroboration of 4-Methoxyacetophenone.  $^1\text{H}$

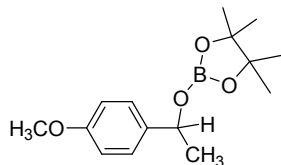

NMR ( $\text{CDCl}_3$ , 200 MHz),  $\delta$  1.21 (s, 6 H, Bpin- $\text{CH}_3$ ), 1.23 (s, 6H, Ar- $\text{CH}_3$ ), 1.46 (d,  $^3J_{\text{HH}} = 6.4$  Hz, 3H, OCH $\text{CH}_3$ ), 3.78 (s, 3H, PhOCH $_3$ ), 5.19 (q, 1H, pinBOCH), 6.87 (d,  $^3J_{\text{HH}} = 8.1$  Hz, 2H, Ar- $\text{H}$ ), 7.31 (d,  $^3J_{\text{HH}} = 8.9$  Hz, 2H, Ar- $\text{H}$ );  $^{13}\text{C}$  NMR ( $\text{CDCl}_3$ , 50.28 MHz), 23.48 (Bpin- $\text{CH}_3$ ), 24.31 (OCH $\text{CH}_3$ ), 54.16 (PhOCH $_3$ ), 71.20 (OCH $_2$ Ph), 81.63 (Bpin-C), 125.87, 129.58, 135.78, 136.65, 157.70 (Ar-C).

**(4-NH<sub>2</sub>Ph)(Me)CHOBpin (3d)**:product from hydroboration of 4-Aminoacetophenone. <sup>1</sup>H NMR

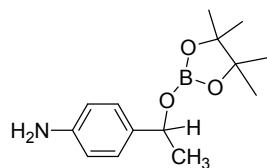

(CDCl<sub>3</sub>, 200 MHz), δ 1.68 (s, 12H, Bpin-CH<sub>3</sub>), 1.94 (d, <sup>3</sup>J<sub>HH</sub> = 6.5 Hz, 3H, OCHCH<sub>3</sub>), 4.09 (s, 2H, PhONH<sub>2</sub>), 5.63 (q, 1H, pinBOCH), 7.11 (d, <sup>3</sup>J<sub>HH</sub> = 7.8 Hz, 2H, Ar-H), 7.61 (d, <sup>3</sup>J<sub>HH</sub> = 8.7 Hz, 2H, Ar-H); <sup>13</sup>C NMR ( CDCl<sub>3</sub>, 50.28 MHz), 21.22 (OCHCH<sub>3</sub>), 24.63 (Bpin-CH<sub>3</sub>), 65.59 (OCH<sub>2</sub>Ph), 83.43 (Bpin-C), 123.62, 126.93, 128.36, 137.72, 146.65 (Ar-C).

**(4-NO<sub>2</sub>Ph)(Me)CHOBpin (3e)**:product from hydroboration of 4-Nitroacetophenone. <sup>1</sup>H NMR

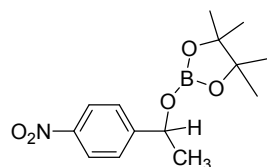

(CDCl<sub>3</sub>, 200 MHz), δ 1.71 (s, 6 H, Bpin-CH<sub>3</sub>), 1.73 (s, 6H, Ar-CH<sub>3</sub>), 2.02 (d, <sup>3</sup>J<sub>HH</sub> = 6.4 Hz, 3H, OCHCH<sub>3</sub>), 5.82 (q, 1H, pinBOCH), 7.96 (d, <sup>3</sup>J<sub>HH</sub> = 7.7 Hz, 2H, Ar-H), 8.16 (d, <sup>3</sup>J<sub>HH</sub> = 8.0 Hz, 2H, Ar-H); <sup>13</sup>C NMR ( CDCl<sub>3</sub>, 50.28 MHz), 21.22 (OCHCH<sub>3</sub>), 24.57 (Bpin-CH<sub>3</sub>), 71.72 (OCH<sub>2</sub>Ph), 83.18 (Bpin-C), 126.93, 129.31, 131.59, 133.84, 137.72 (Ar-C).

**(4-BrPh)(Me)CHOBpin (3f)**:product from hydroboration of 4-Bromoacetophenone. <sup>1</sup>H NMR

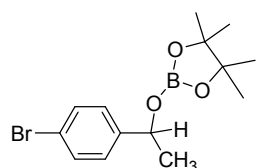

(CDCl<sub>3</sub>, 200 MHz), δ 1.12 (s, 6 H, Bpin-CH<sub>3</sub>), 1.15 (s, 6H, Ar-CH<sub>3</sub>), 1.35 (d, <sup>3</sup>J<sub>HH</sub> = 6.5 Hz, 3H, OCHCH<sub>3</sub>), 5.12 (q, 1H, pinBOCH), 7.16 (d, <sup>3</sup>J<sub>HH</sub> = 8.4 Hz, 2H, Ar-H), 7.26 (d, <sup>3</sup>J<sub>HH</sub> = 8.6 Hz, 2H, Ar-H); <sup>13</sup>C NMR ( CDCl<sub>3</sub>, 50.28 MHz), 21.22 (OCHCH<sub>3</sub>), 23.80 (Bpin-CH<sub>3</sub>), 68.91 (OCH<sub>2</sub>Ph), 71.26 (Bpin-C), 120.14, 127.59, 130.55, 136.94, 142.87 (Ar-C).

**(Ph)(Ph)CHOBpin (3g)**:product from hydroboration of Benzophenone. <sup>1</sup>H NMR (CDCl<sub>3</sub>, 200

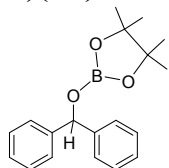

MHz), δ 1.11 (s, 12H, Bpin-CH<sub>3</sub>), 6.12 (s, 1H, pinBOCH), 7.21 (m, 10H Ar-H); <sup>13</sup>C NMR ( CDCl<sub>3</sub>, 50.28 MHz), 20.46 (Bpin-CH<sub>3</sub>), 82.25 (Bpin-C), 125.77, 126.18, 126.56, 127.51, 129.33, 136.94, 142.38, 143.17 (Ar-C).

**(2-ClEt)(Me)CHOBpin (3h)**:product from hydroboration of 2-Chloroethylmethylketone. <sup>1</sup>H NMR

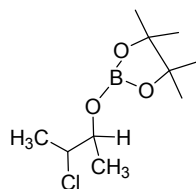

(CDCl<sub>3</sub>, 200 MHz), δ 1.18 (s, 12 H, Bpin-CH<sub>3</sub>), 1.40 (dd, <sup>3</sup>J<sub>HH</sub> = 6.4 Hz, 3H, OCHCH<sub>3</sub>), 4.19 (q, 1H, pinBOCH); <sup>13</sup>C NMR ( CDCl<sub>3</sub>, 50.28 MHz) 18.61 (CClCH<sub>3</sub>), 20.03 (OCHCH<sub>3</sub>), 21.75 (Bpin-CH<sub>3</sub>), 61.24 (CClCH<sub>3</sub>), 74.36 (BpinOCCH<sub>3</sub>), 83.47 (Bpin-C).

**(3-OHEt)(Me)CHOBpin (3i):** product from hydroboration of 3-Hydroxypropylmethylketone. <sup>1</sup>H

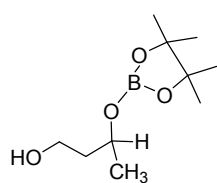

NMR (CDCl<sub>3</sub>, 200 MHz), δ 1.17 (s, 12H, Bpin-CH<sub>3</sub>), 1.37 (m, 2H, HOCH<sub>2</sub>CH<sub>2</sub>), 1.39 (dd, <sup>3</sup>J<sub>HH</sub> = 6.4 Hz, 3H, OCHCH<sub>3</sub>), 3.85 (q, 1H, pinBOCH), 4.16 (m, 2H); <sup>13</sup>C NMR (CDCl<sub>3</sub>, 50.28 MHz), 20.16 (OCHCH<sub>3</sub>), 23.54 (Bpin-CH<sub>3</sub>), 60.85 (OHCH<sub>2</sub>), 66.92 (OHCH<sub>2</sub>CH<sub>2</sub>), 83.18 (Bpin-C).

**(<sup>i</sup>Pr)(Me)CHOBpin (3j):** product from hydroboration of Methyl isopropyl ketone. <sup>1</sup>H NMR (CDCl<sub>3</sub>,

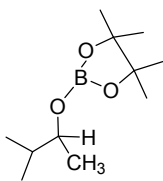

200 MHz), δ 0.79 (d, <sup>3</sup>J<sub>HH</sub> = 2.79, 3H, EtH), 0.81 (d, <sup>3</sup>J<sub>HH</sub> = 2.8 Hz, 3H, EtH), 1.04 (d, <sup>3</sup>J<sub>HH</sub> = 6.09 Hz, 3H, MeH), 1.16 (s, 12 H, Bpin-CH<sub>3</sub>), 1.56 (m, 1H, EtHCH), 3.87 (q, 1H, pinBOCH); <sup>13</sup>C NMR (CDCl<sub>3</sub>, 50.28 MHz), 18.07 (EtC), 21.12 (OCHCH<sub>3</sub>), 24.47 (Bpin-CH<sub>3</sub>), 34.31 (EtCHCHOBpin), 82.32 (Bpin-C).

### 8. Table S3: TON and TOF table for ketone hydroboration:

| Entry | Substrate | Time (h) | Catalyst mol% | Yield (NMR) | TON | TOF[h <sup>-1</sup> ] |
|-------|-----------|----------|---------------|-------------|-----|-----------------------|
| 3a    |           | 5 h      | 3             | 95 %        | 47  | 9.5                   |
| 3b    |           | 5 h      | 3             | 79 %        | 26  | 5.2                   |
| 3c    |           | 5 h      | 3             | 78 %        | 26  | 5.2                   |

|    |                                                                                     |     |   |      |      |      |
|----|-------------------------------------------------------------------------------------|-----|---|------|------|------|
| 3d | 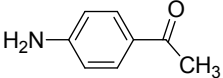   | 5 h | 3 | 80 % | 40   | 8    |
| 3e |    | 5 h | 3 | 73 % | 24   | 4.8  |
| 3f |    | 5 h | 3 | 83 % | 27   | 5.5  |
| 3g |   | 5 h | 3 | 86 % | 43   | 8.6  |
| 3h |  | 5 h | 3 | 75 % | 23.6 | 4.73 |
| 3i |  | 5 h | 3 | 64 % | 21.3 | 4.27 |
| 3j |  | 5 h | 3 | 72 % | 23.3 | 4.67 |

## 9. NMR Spectra

$^1\text{H}$  NMR of  $\text{PhCH}_2\text{OBpin}$  ( $\text{CDCl}_3$ , 200 MHz):

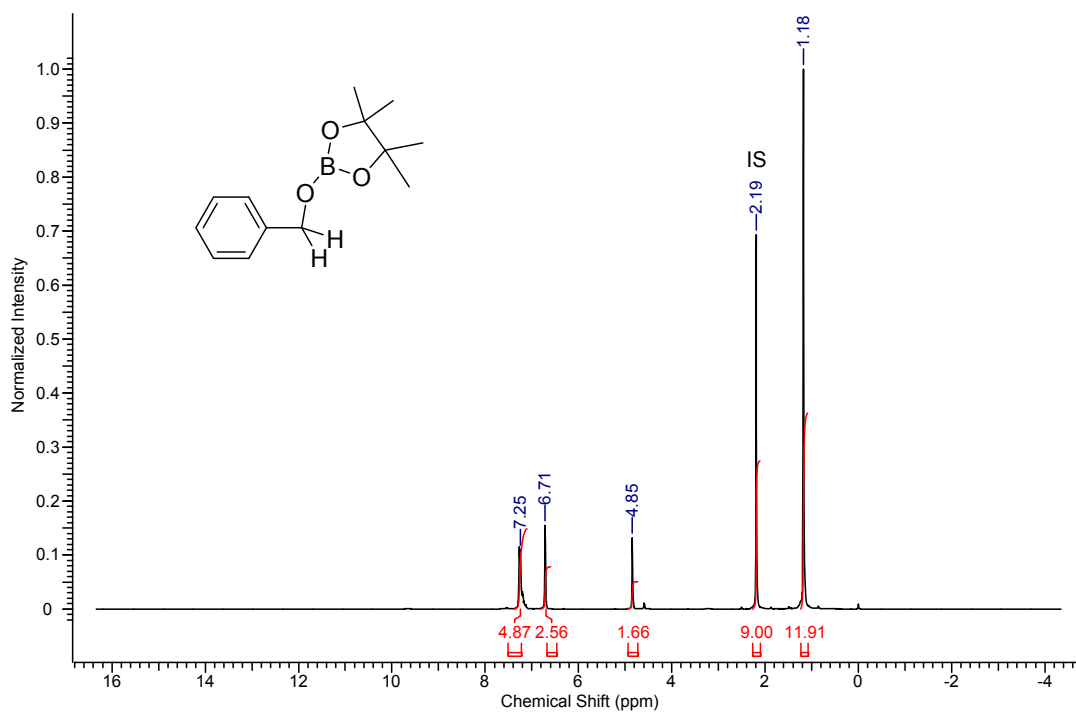

$^{13}\text{C}$  NMR of  $\text{PhCH}_2\text{OBpin}$  ( $\text{CDCl}_3$ , 50.28MHz):

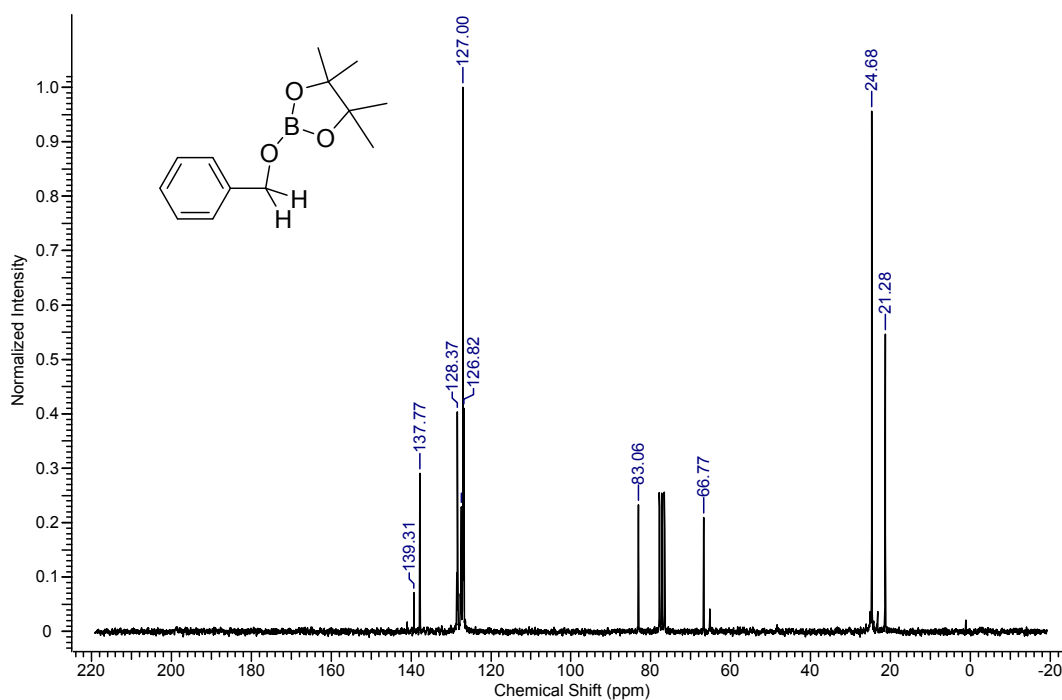

$^1\text{H}$  NMR of 2-BrPhCH<sub>2</sub>OBpin (CDCl<sub>3</sub>, 200 MHz):

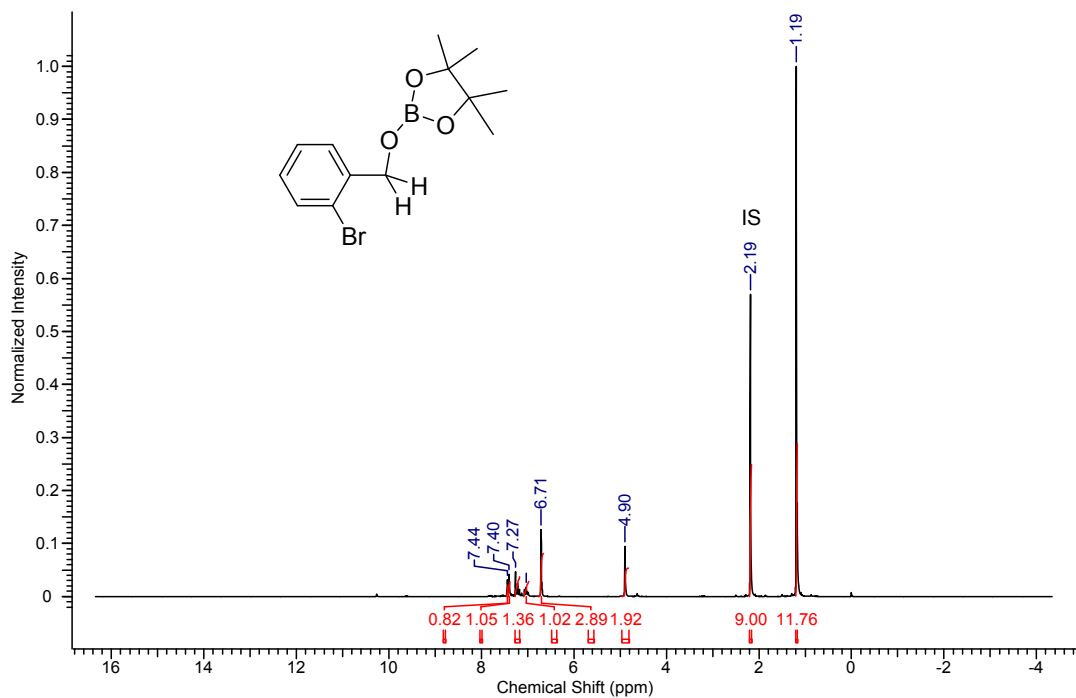

$^{13}\text{C}$  NMR of 2-BrPhCH<sub>2</sub>OBpin (CDCl<sub>3</sub>, 50.28 MHz)

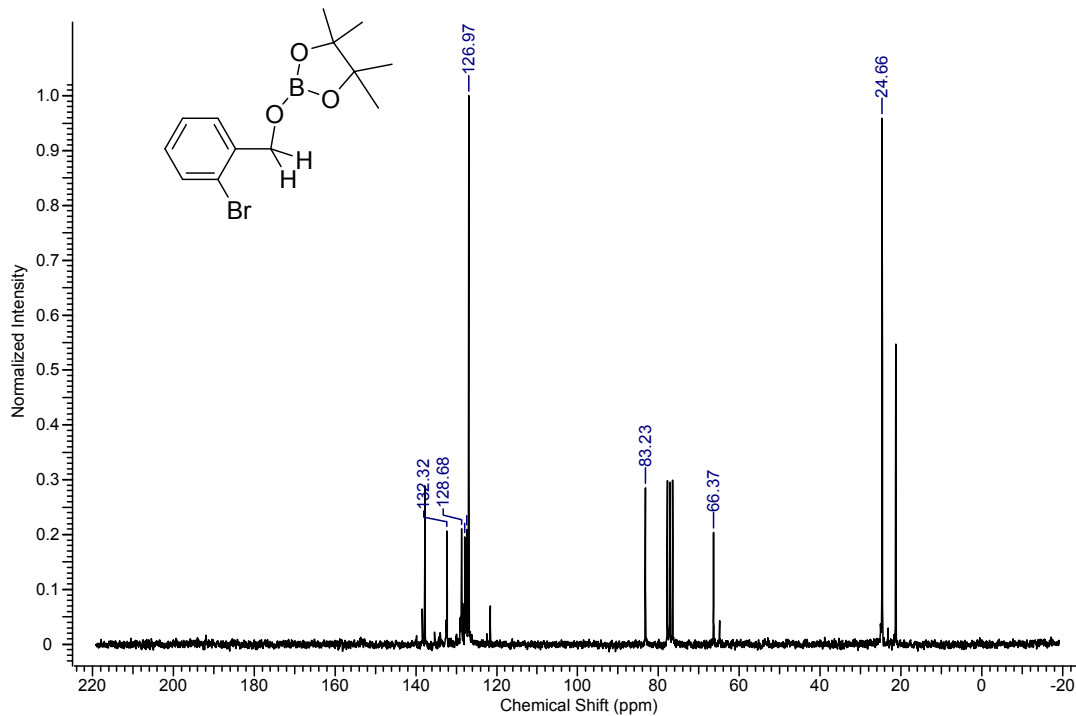

$^1\text{H}$  NMR of 3-BrPhCH<sub>2</sub>OBpin (CDCl<sub>3</sub>, 200 MHz):

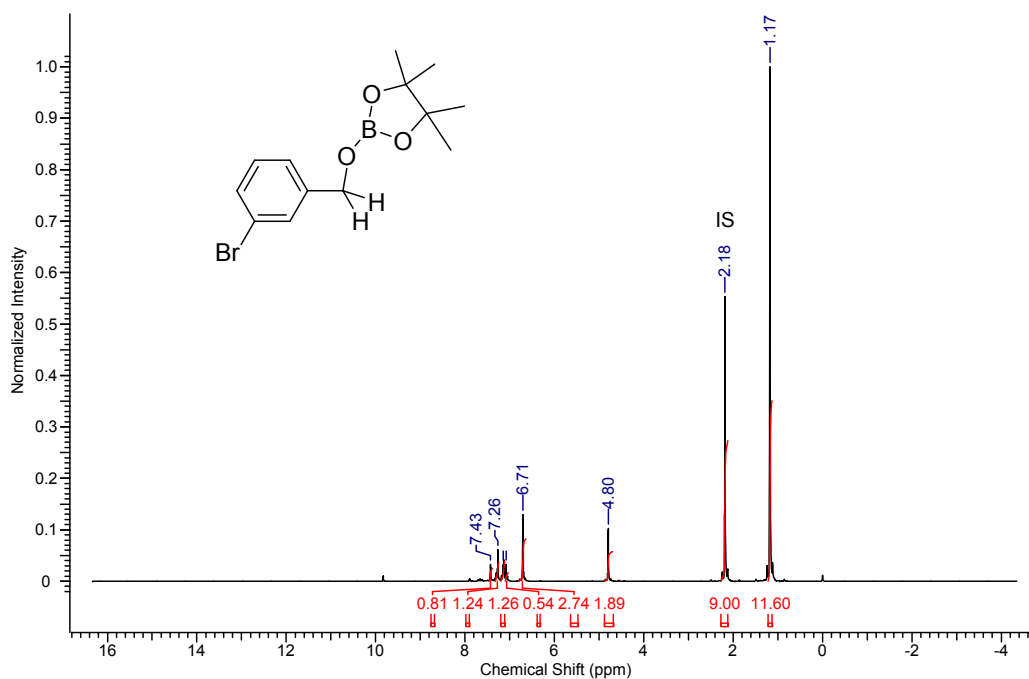

$^{13}\text{C}$  NMR of 3-BrPhCH<sub>2</sub>OBpin (CDCl<sub>3</sub>, 50.28 MHz)

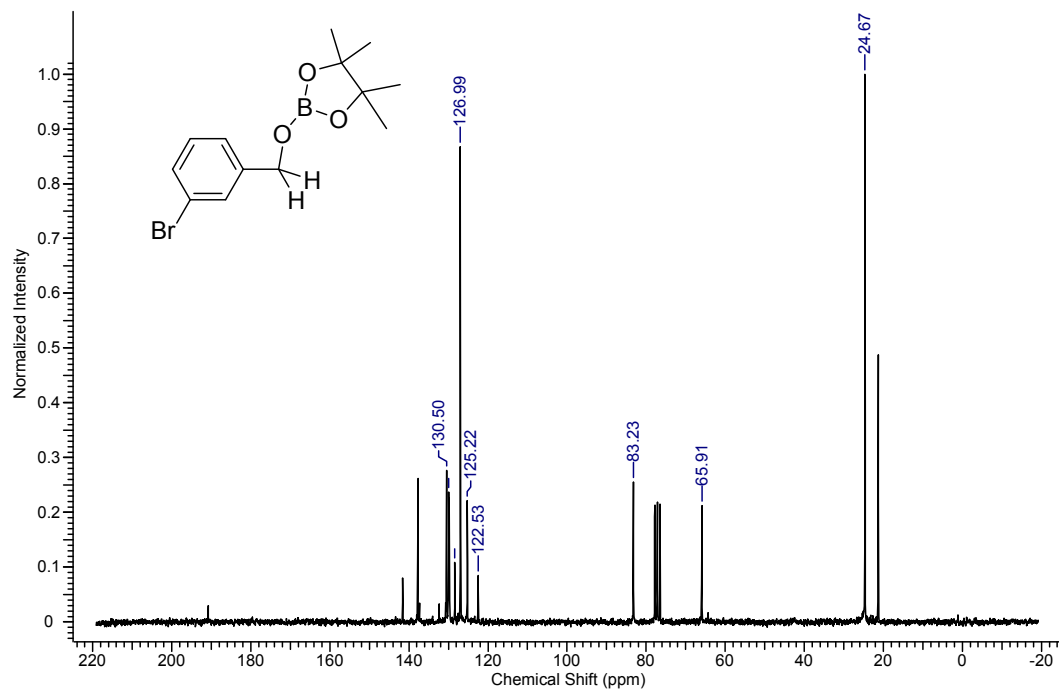

$^1\text{H}$  NMR of 4-BrPhCH<sub>2</sub>OBpin (CDCl<sub>3</sub>, 200 MHz):

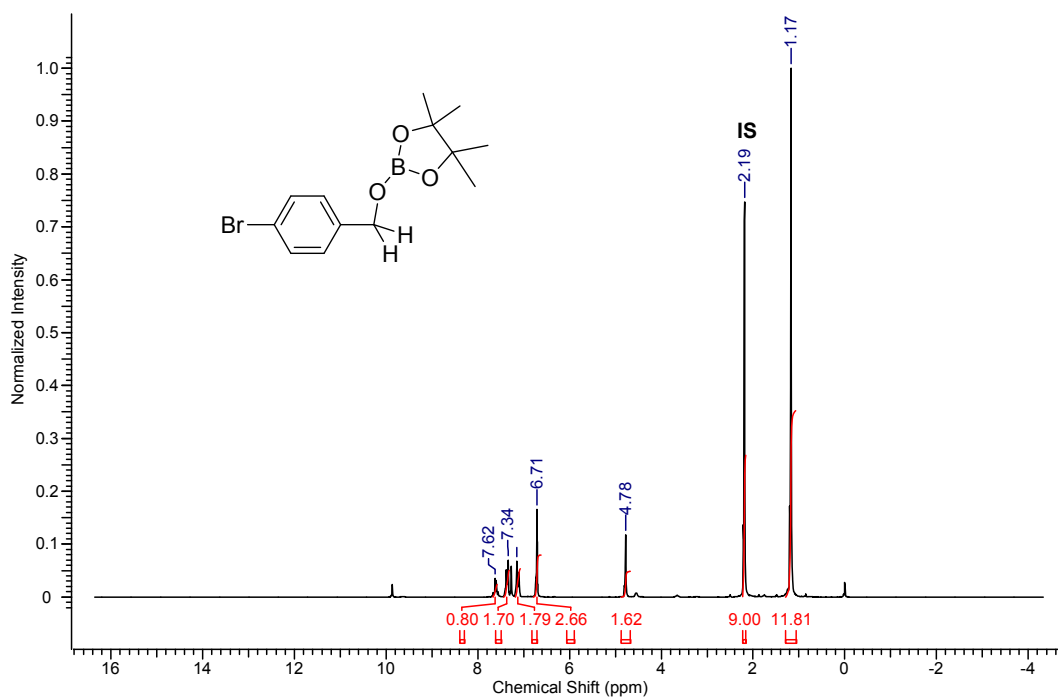

$^{13}\text{C}$  NMR of 4-BrPhCH<sub>2</sub>OBpin (CDCl<sub>3</sub>, 200 MHz):

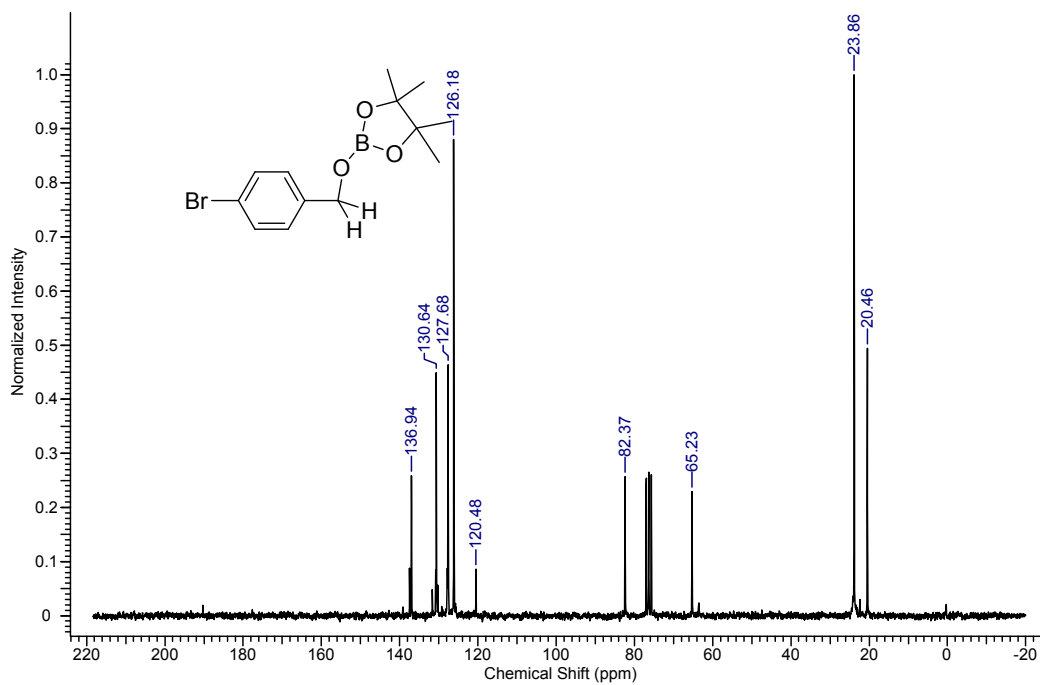



$^1\text{H}$  NMR of 4-NO<sub>2</sub>PhCH<sub>2</sub>OBpin (CDCl<sub>3</sub>, 200 MHz):

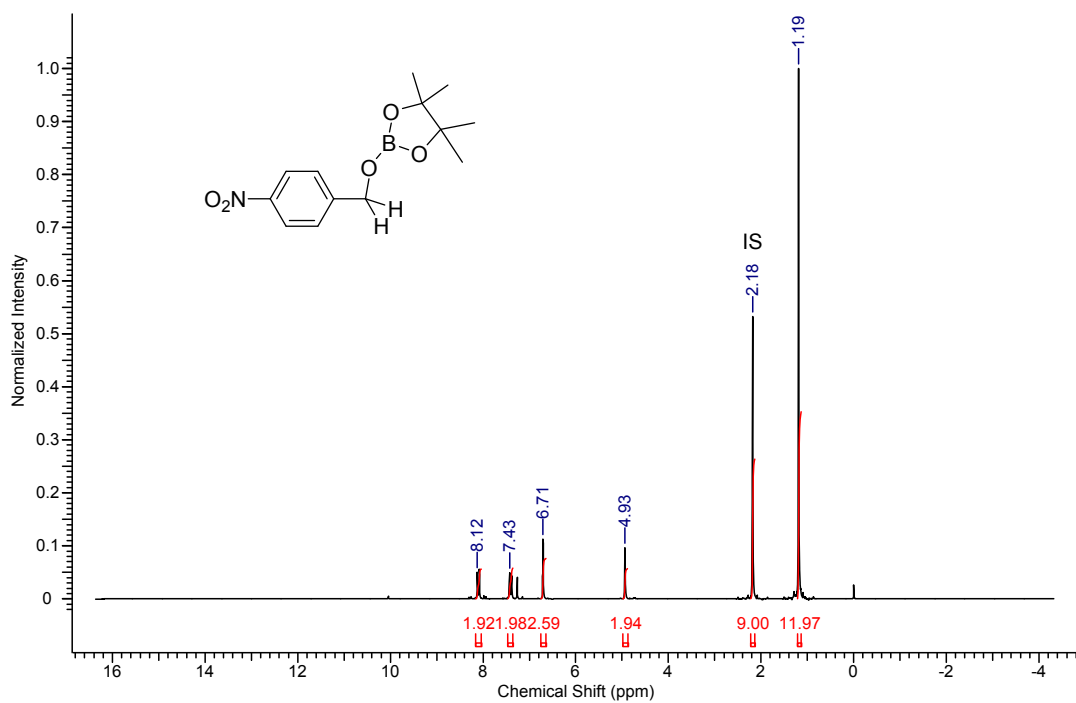

$^{13}\text{C}$  NMR of 4-NO<sub>2</sub>PhCH<sub>2</sub>OBpin (CDCl<sub>3</sub>, 200 MHz):

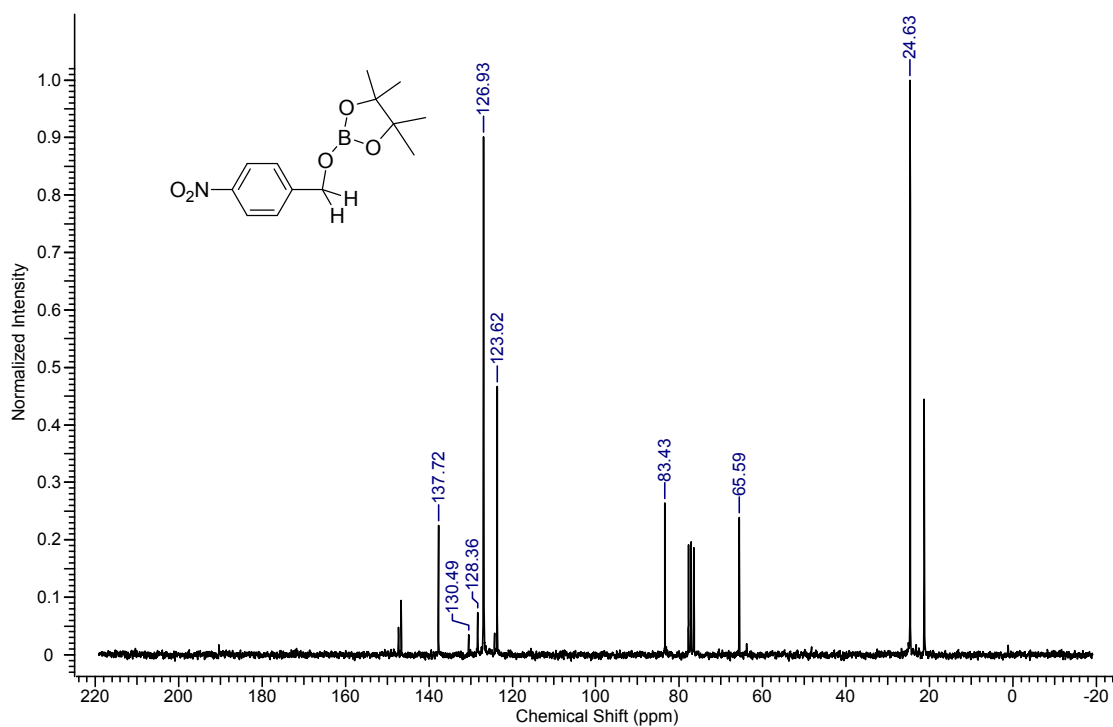

$^1\text{H}$  NMR of 4-FPhCH<sub>2</sub>OBpin (CDCl<sub>3</sub>, 200 MHz):

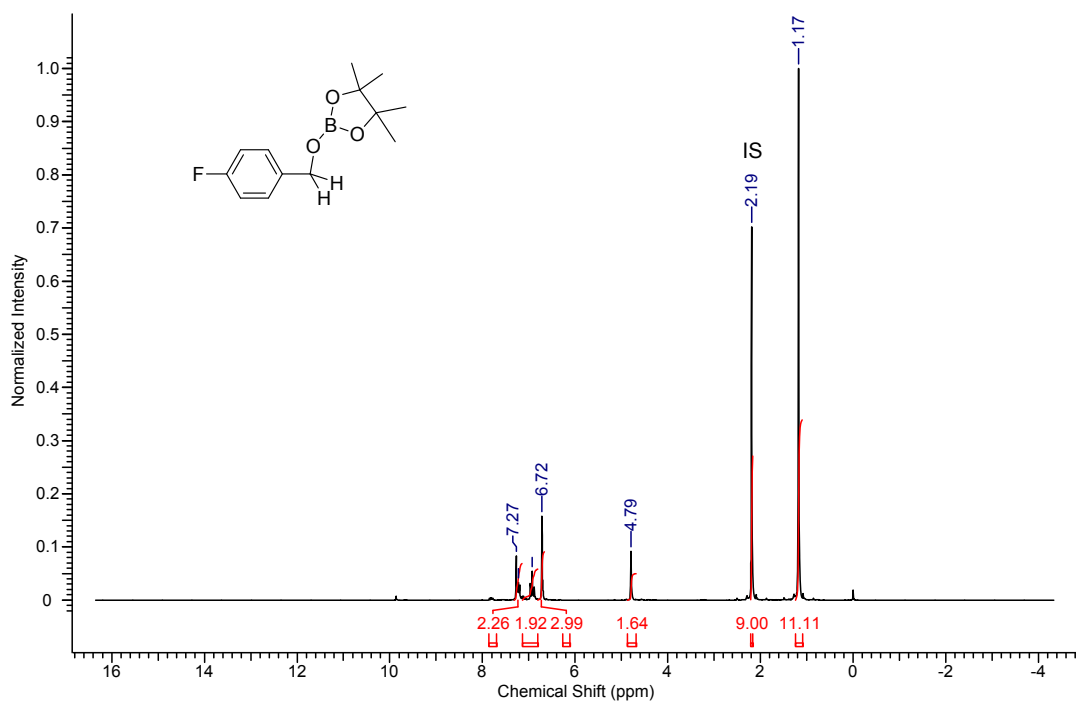

$^{13}\text{C}$  NMR of 4-FPhCH<sub>2</sub>OBpin (CDCl<sub>3</sub>, 50.28 MHz):

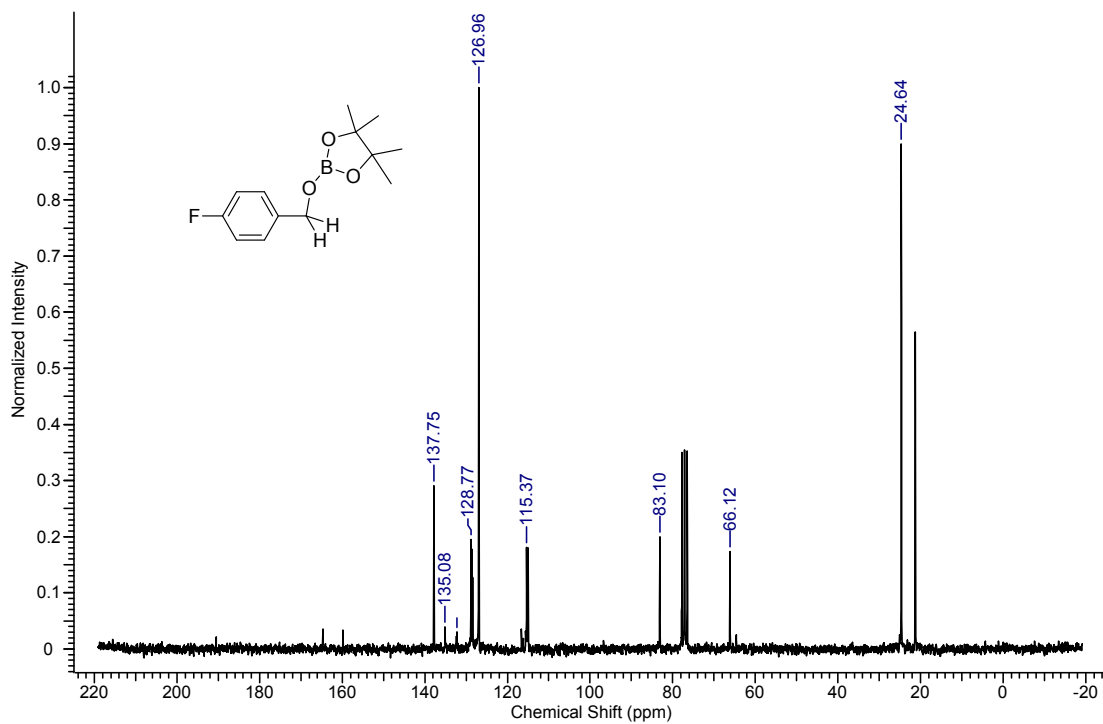

$^1\text{H}$  NMR of 4- $\text{CH}_3\text{PhCH}_2\text{OBpin}$  ( $\text{CDCl}_3$ , 200 MHz):

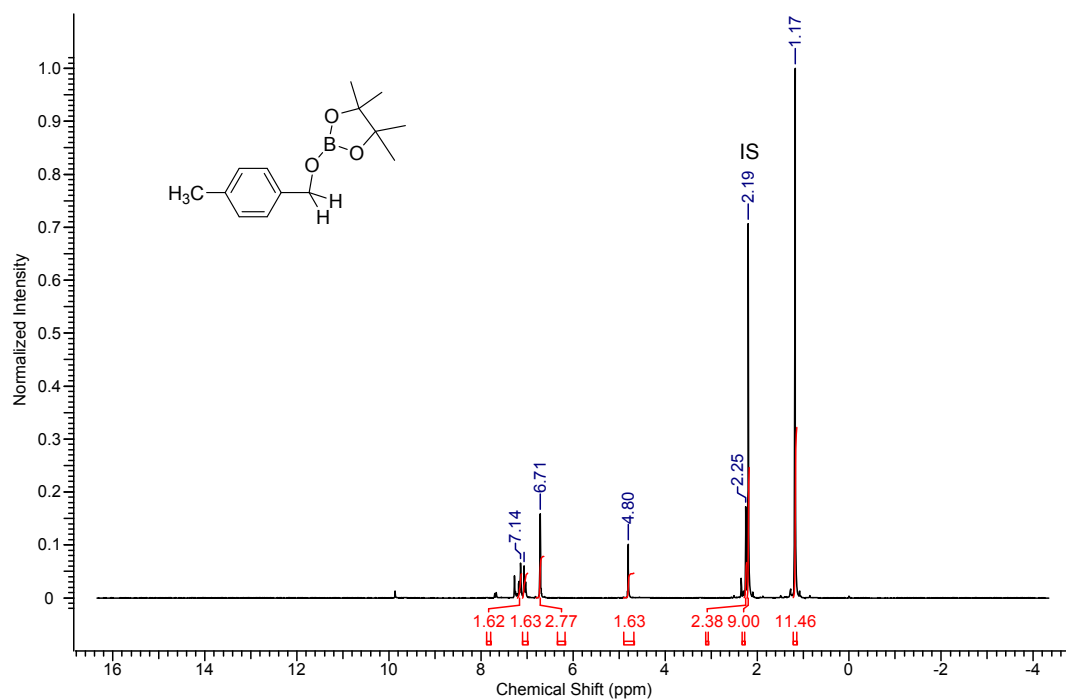

$^{13}\text{C}$  NMR of 4- $\text{CH}_3\text{PhCH}_2\text{OBpin}$  ( $\text{CDCl}_3$ , 50.28 MHz):

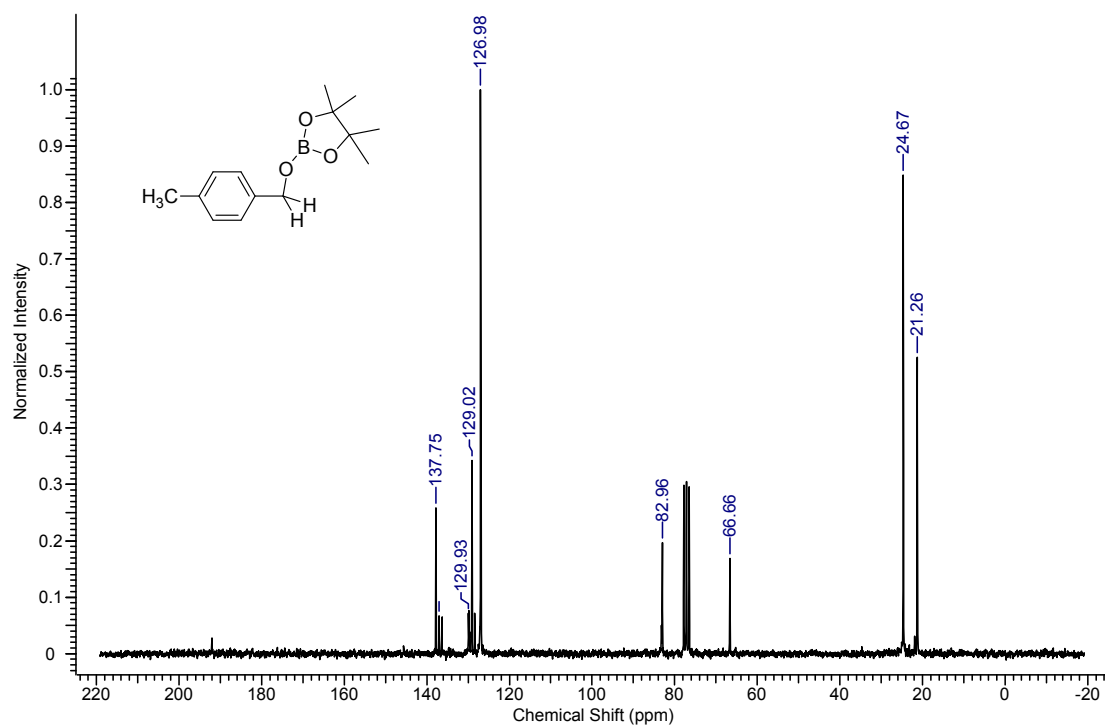

$^1\text{H}$  NMR of 2-OCH<sub>3</sub>PhCH<sub>2</sub>OBpin (CDCl<sub>3</sub>, 200 MHz):

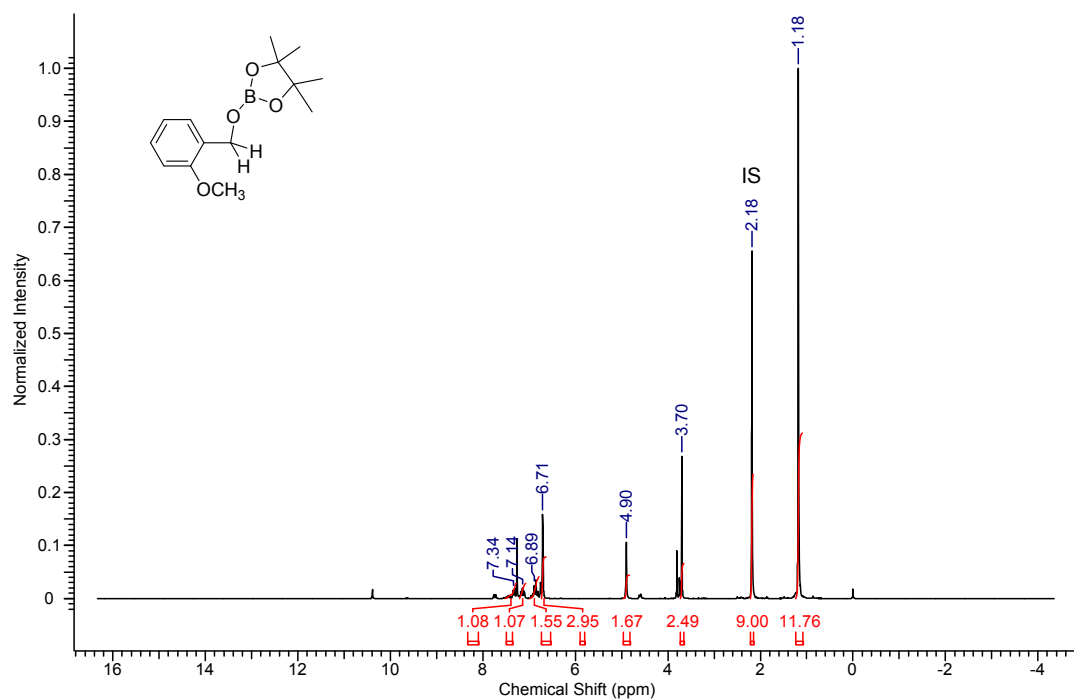

$^{13}\text{C}$  NMR of 2-OCH<sub>3</sub>PhCH<sub>2</sub>OBpin (CDCl<sub>3</sub>, 50.28 MHz):

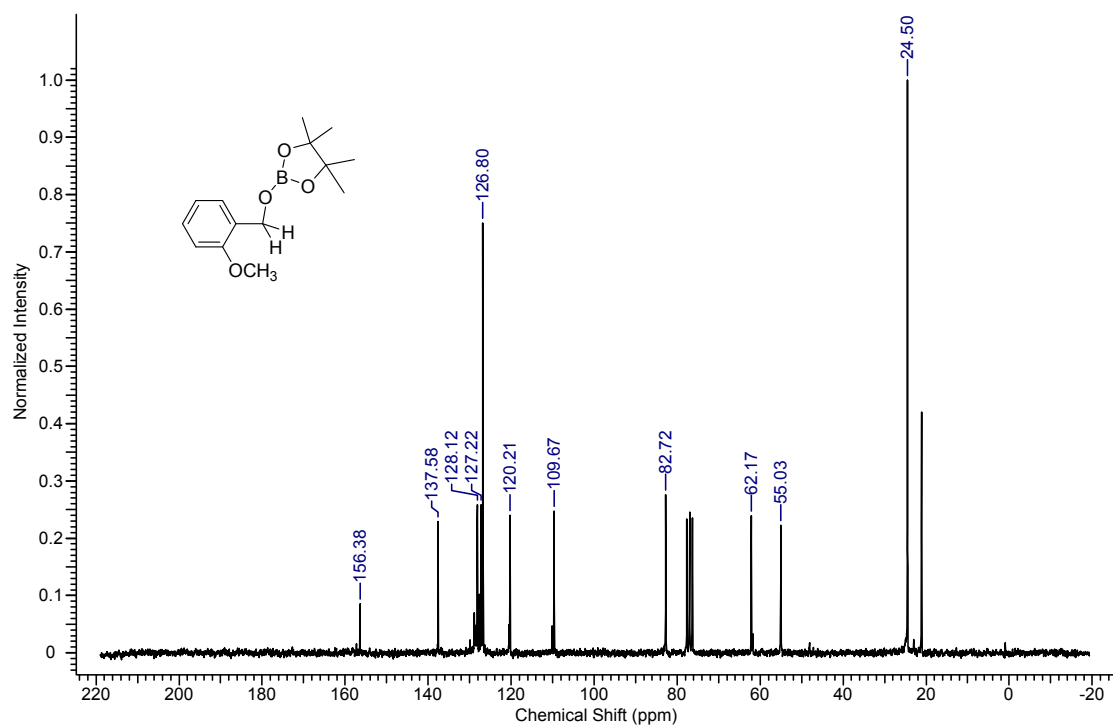

$^1\text{H}$  NMR of 3-OCH<sub>3</sub>PhCH<sub>2</sub>OBpin (CDCl<sub>3</sub>, 200 MHz):

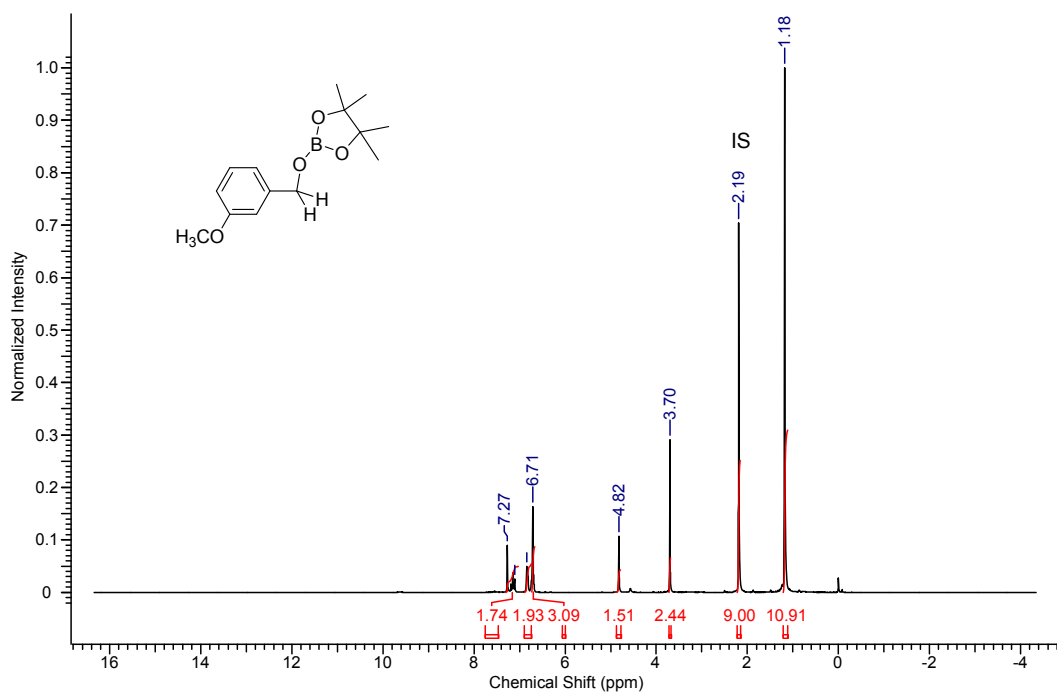

$^{13}\text{C}$  NMR of 3-OCH<sub>3</sub>PhCH<sub>2</sub>OBpin (CDCl<sub>3</sub>, 50.28 MHz):

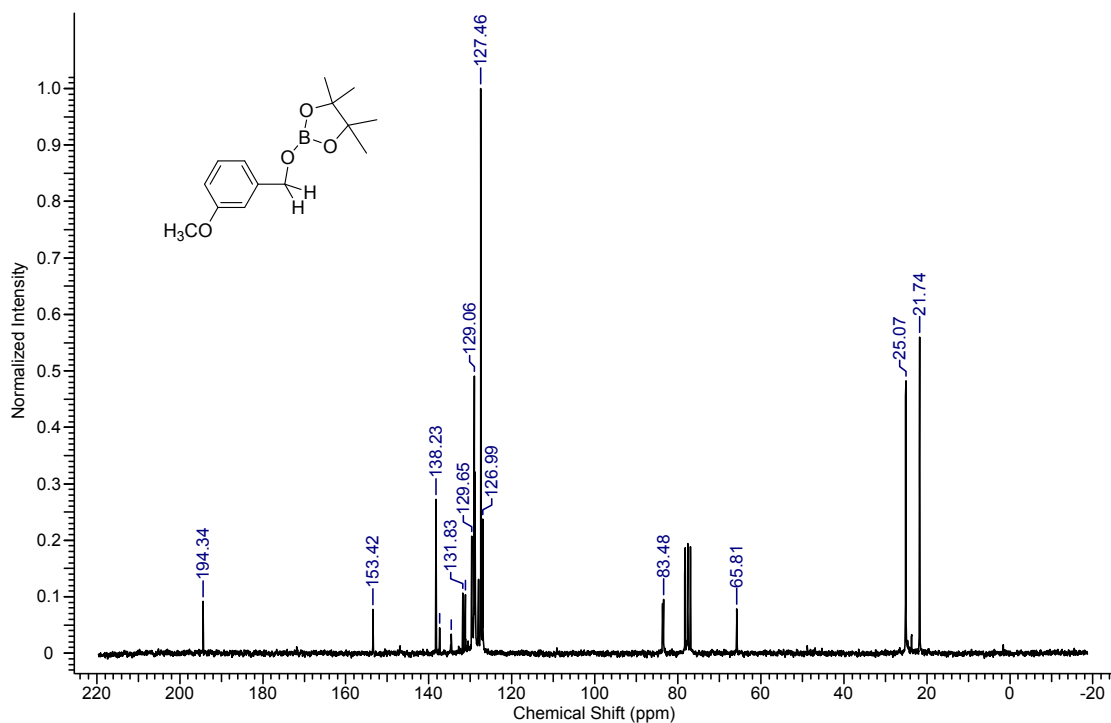

$^1\text{H}$  NMR of 4-OHPhCH<sub>2</sub>OBpin (CDCl<sub>3</sub>, 200 MHz):

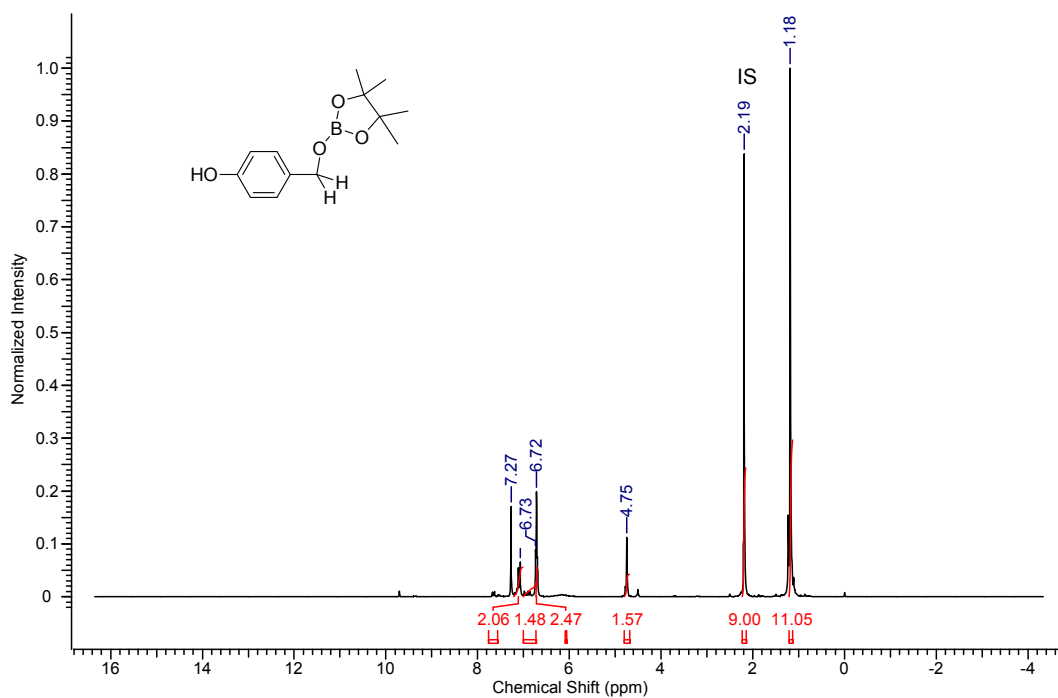

$^{13}\text{C}$  NMR of 4-OHPhCH<sub>2</sub>OBpin (CDCl<sub>3</sub>, 50.28 MHz):

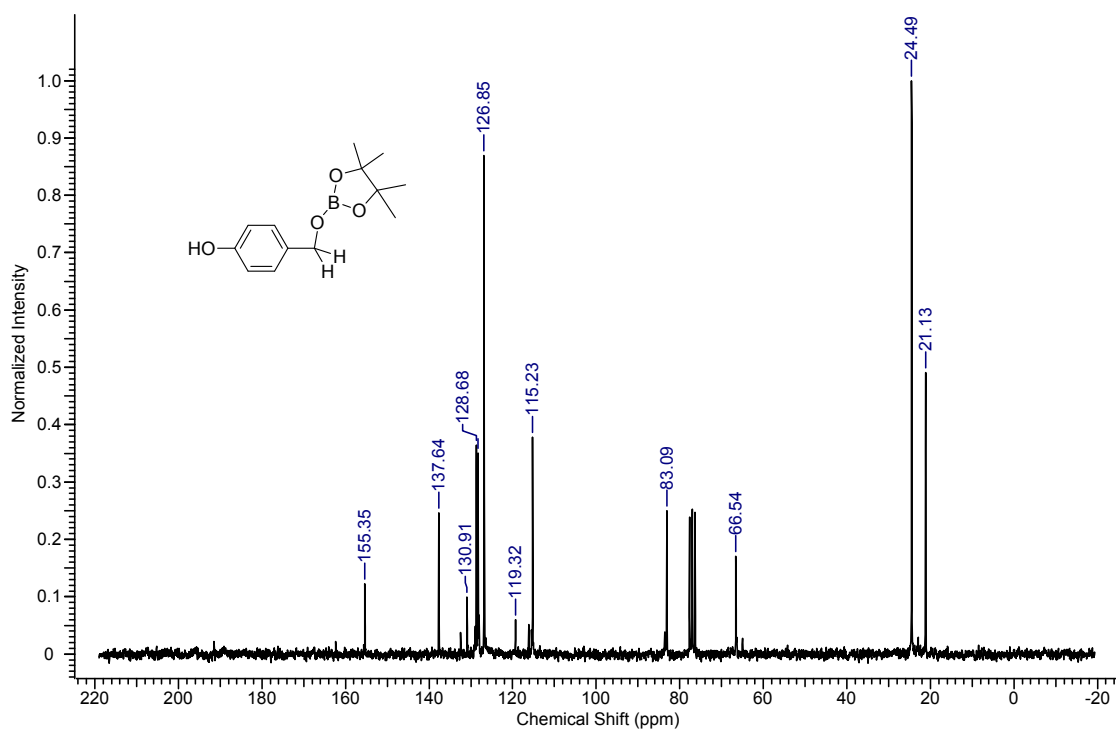

$^1\text{H}$  NMR of 2-OHPhCH<sub>2</sub>OBpin (CDCl<sub>3</sub>, 200 MHz):

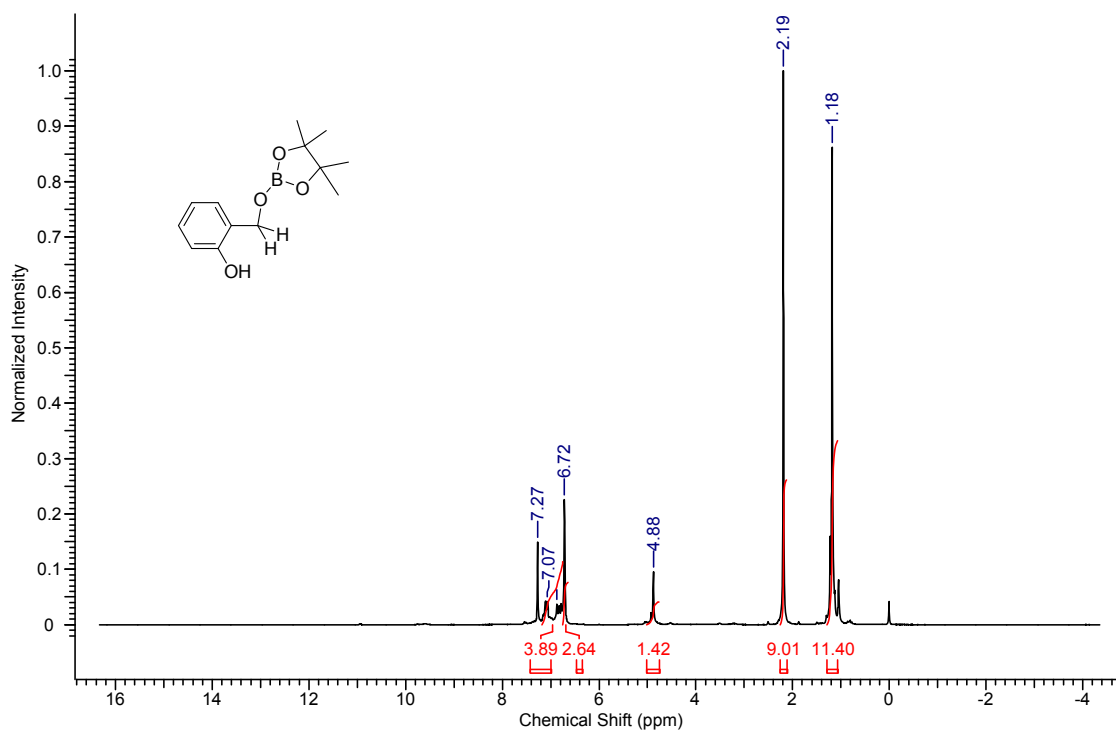

$^{13}\text{C}$  NMR of 2-OHPhCH<sub>2</sub>OBpin (CDCl<sub>3</sub>, 50.28 MHz):

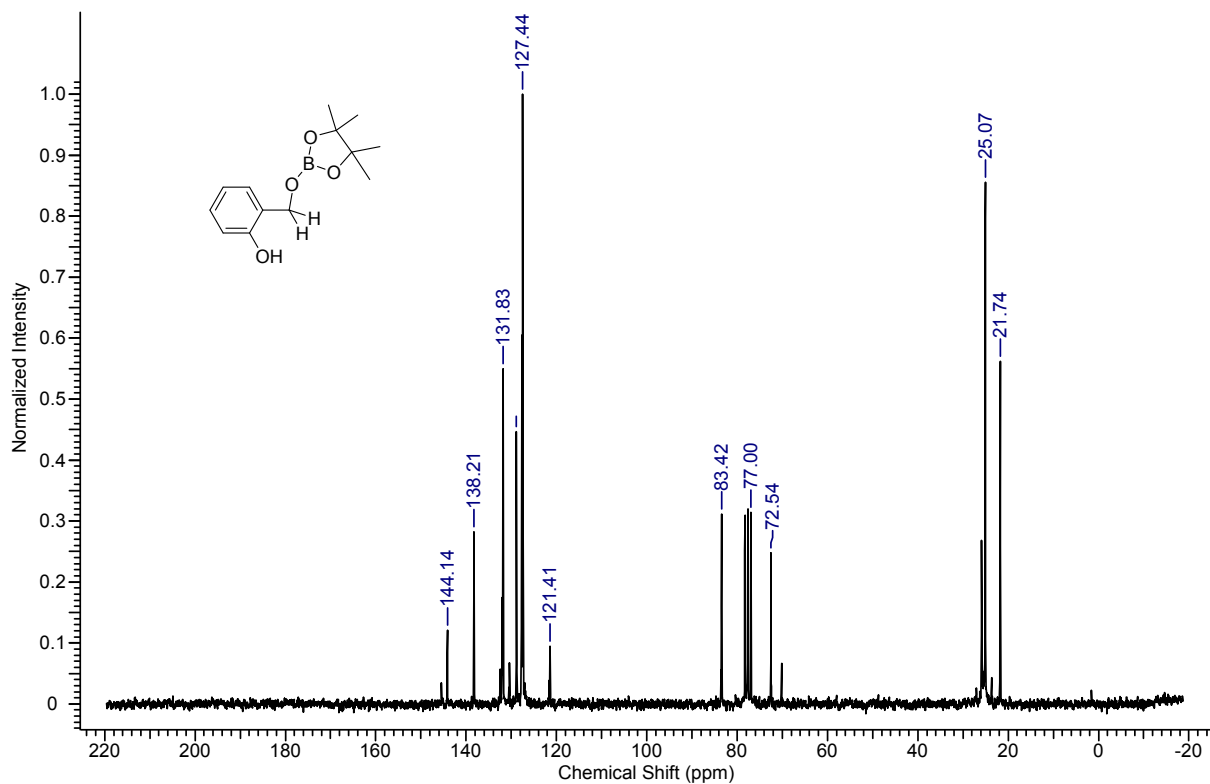

$^1\text{H}$  NMR of 4-CNPhCH<sub>2</sub>OBpin (CDCl<sub>3</sub>, 200 MHz):

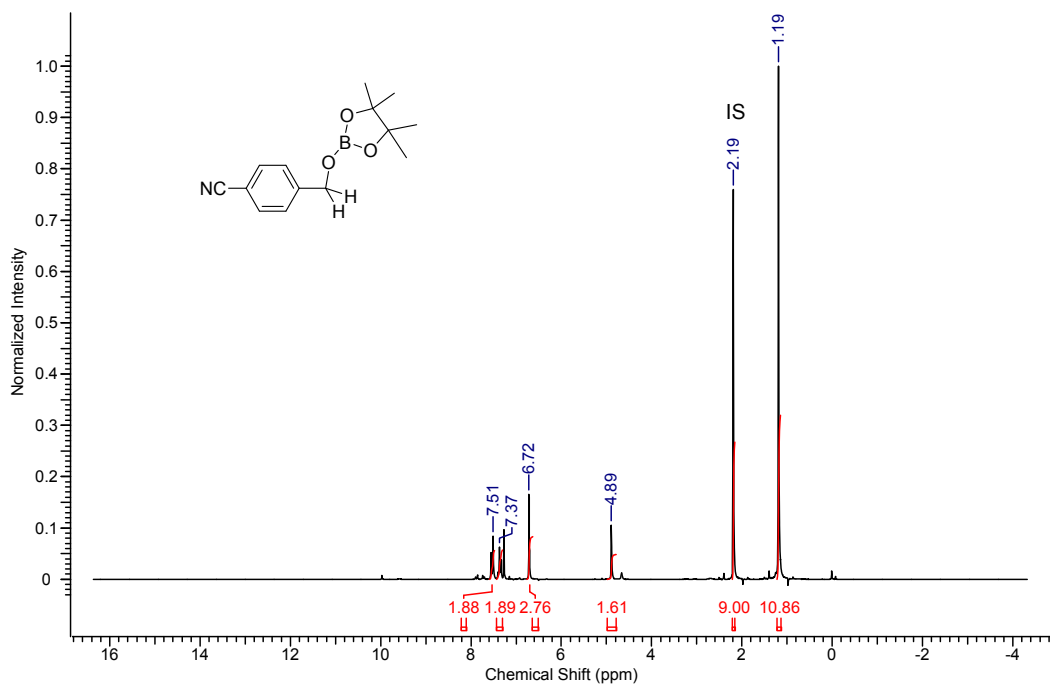

$^{13}\text{C}$  NMR of 4-CNPhCH<sub>2</sub>OBpin (CDCl<sub>3</sub>, 50.28 MHz):

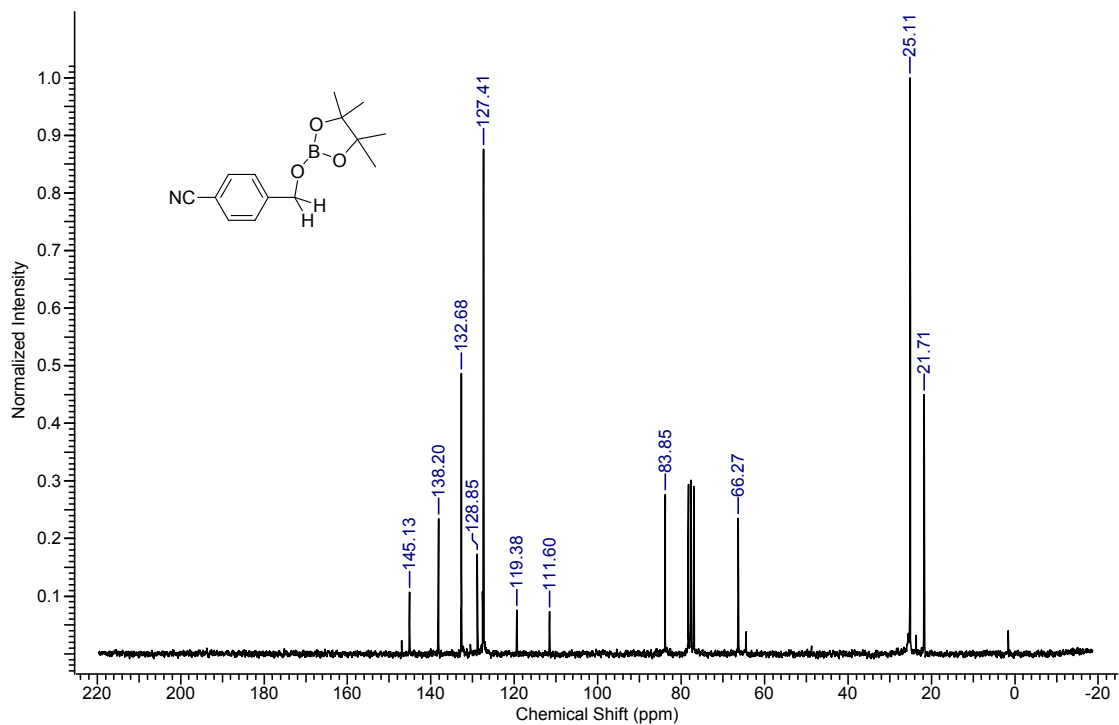



$^1\text{H}$  NMR of  $\text{C}_6\text{H}_5\text{PhCH}_2\text{OBpin}$  ( $\text{CDCl}_3$ , 200 MHz):

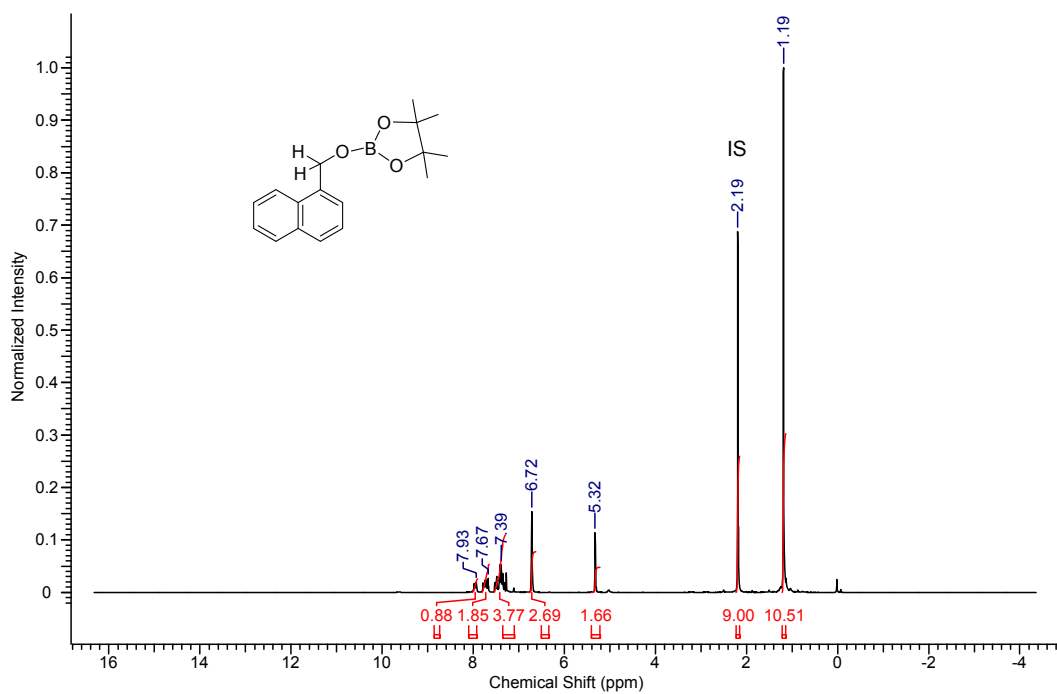

$^{13}\text{C}$  NMR of  $\text{C}_6\text{H}_5\text{PhCH}_2\text{OBpin}$  ( $\text{CDCl}_3$ , 50.28 MHz):

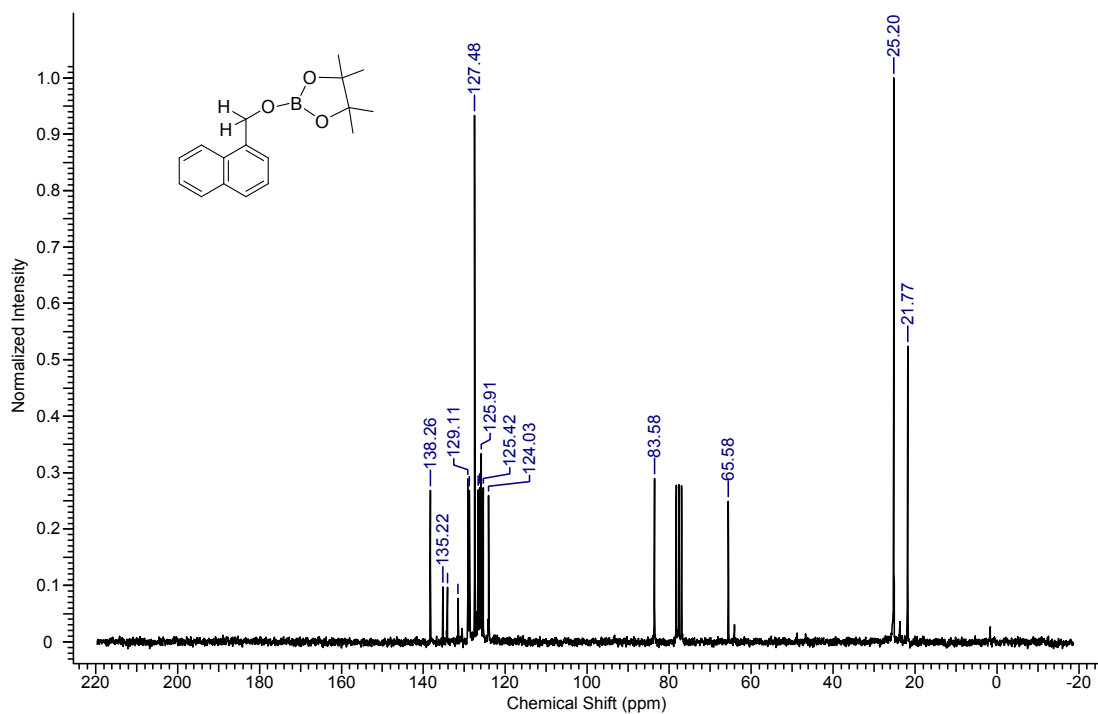

$^1\text{H}$  NMR of  $\text{PhC}_3\text{H}_4\text{OBpin}$  ( $\text{CDCl}_3$ , 200 MHz):

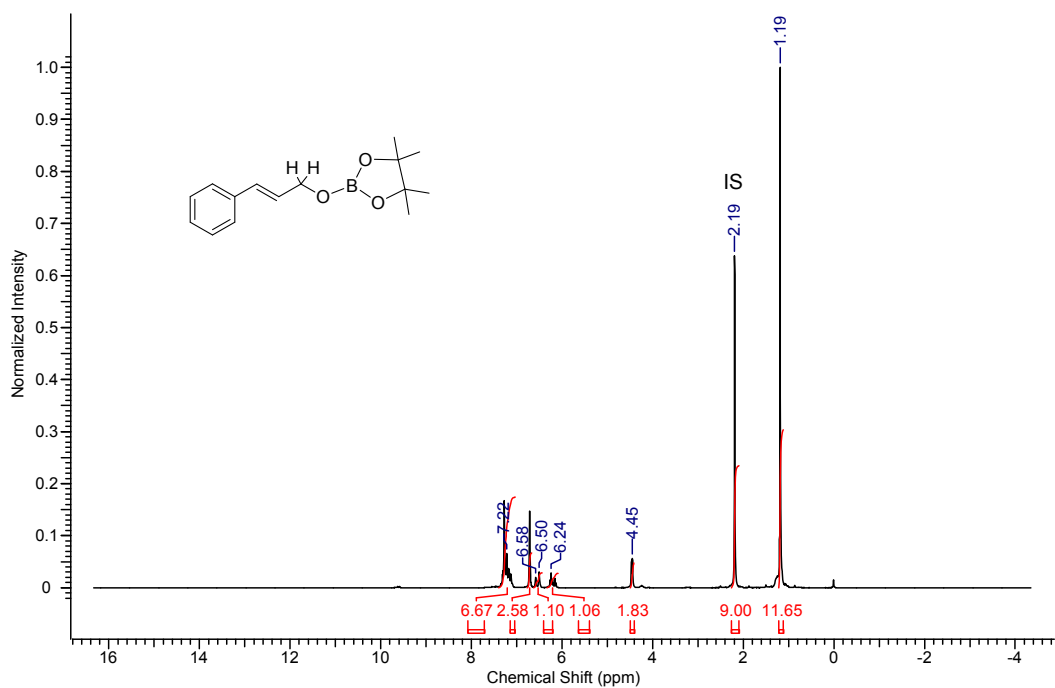

$^{13}\text{C}$  NMR of  $\text{PhC}_3\text{H}_4\text{OBpin}$  ( $\text{CDCl}_3$ , 50.28 MHz):

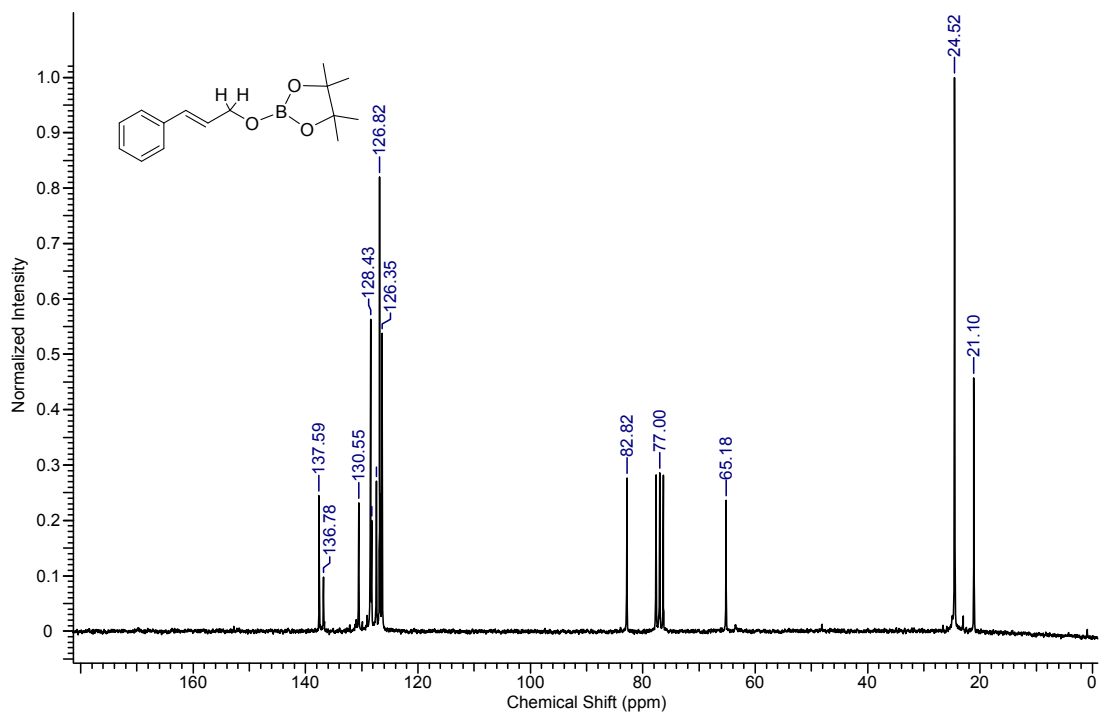

$^1\text{H}$  NMR of 2,6-MePhCH<sub>2</sub>OBpin (CDCl<sub>3</sub>, 200 MHz):

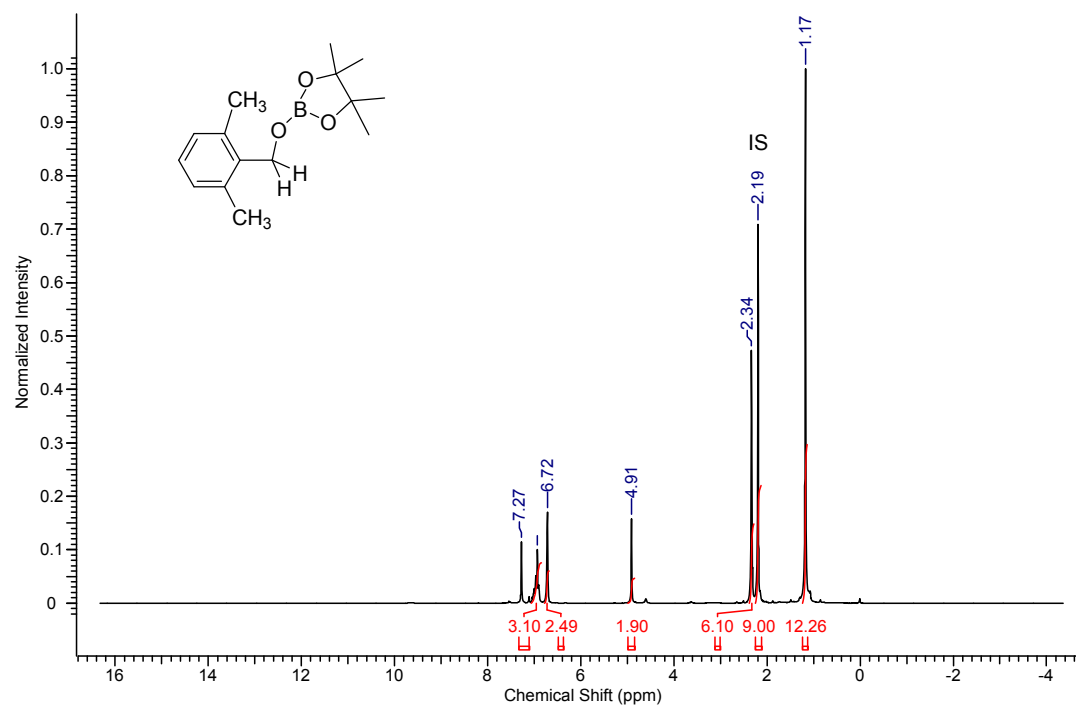

$^{13}\text{C}$  NMR of 2,6-MePhCH<sub>2</sub>OBpin (CDCl<sub>3</sub>, 50.28 MHz):

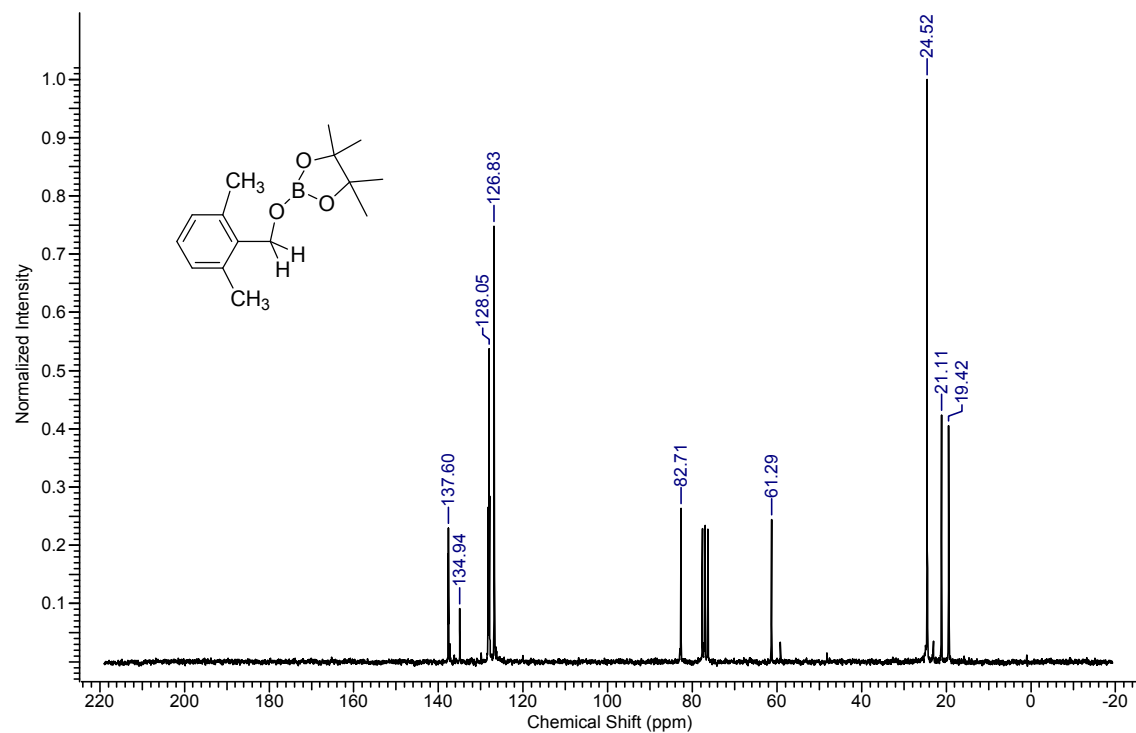

<sup>1</sup>H NMR of FurfuralOBpin (CDCl<sub>3</sub>, 200 MHz):

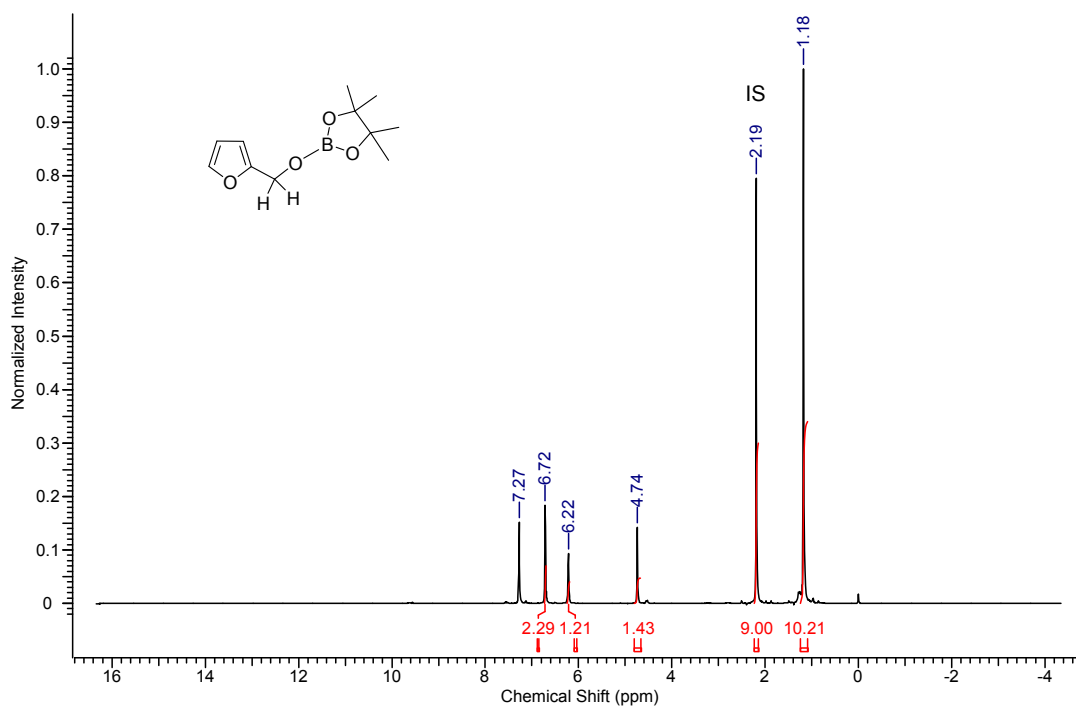

<sup>13</sup>C NMR of FurfuralOBpin (CDCl<sub>3</sub>, 50.28 MHz):

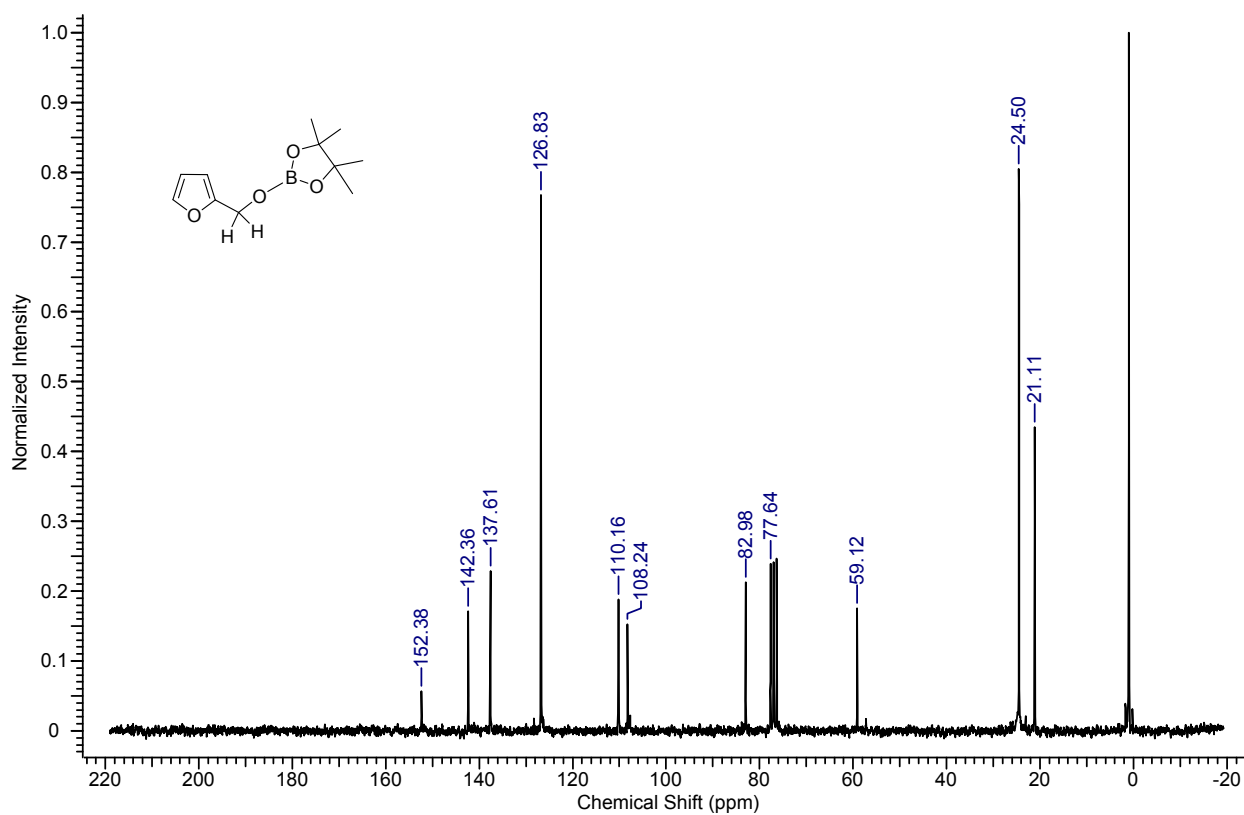

## Ketone

$^1\text{H}$  NMR of (Ph)CHOBpin ( $\text{CDCl}_3$ , 200 MHz):

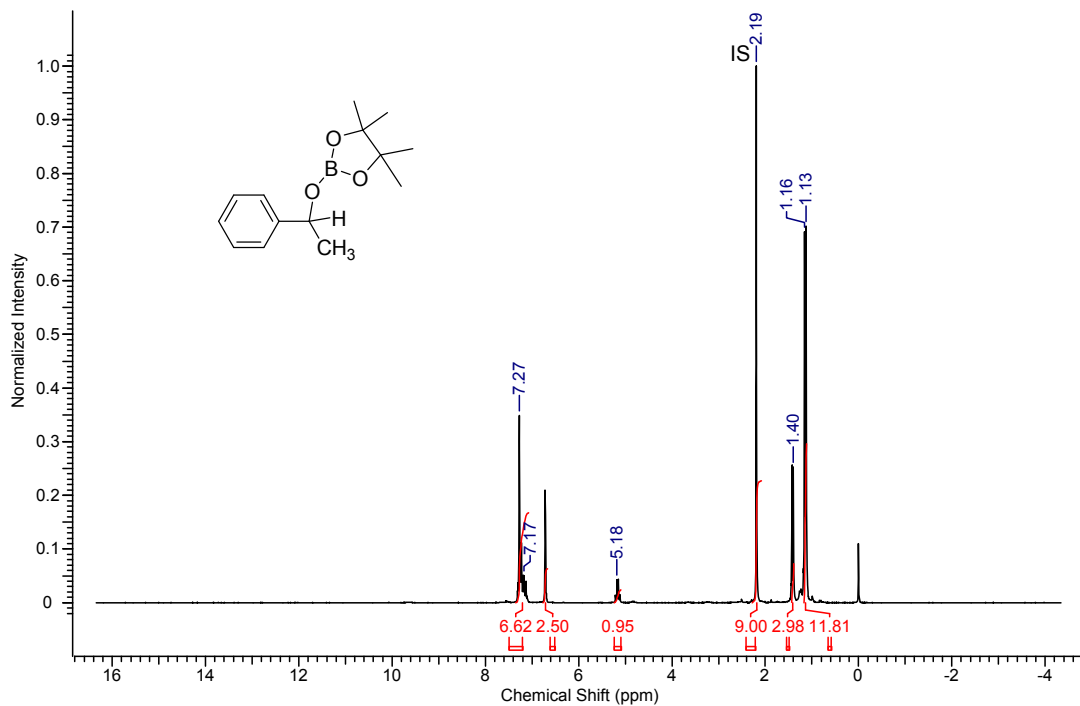

$^{13}\text{C}$  NMR of (Ph)(CHOBpin) ( $\text{CDCl}_3$ , 50.28 MHz):

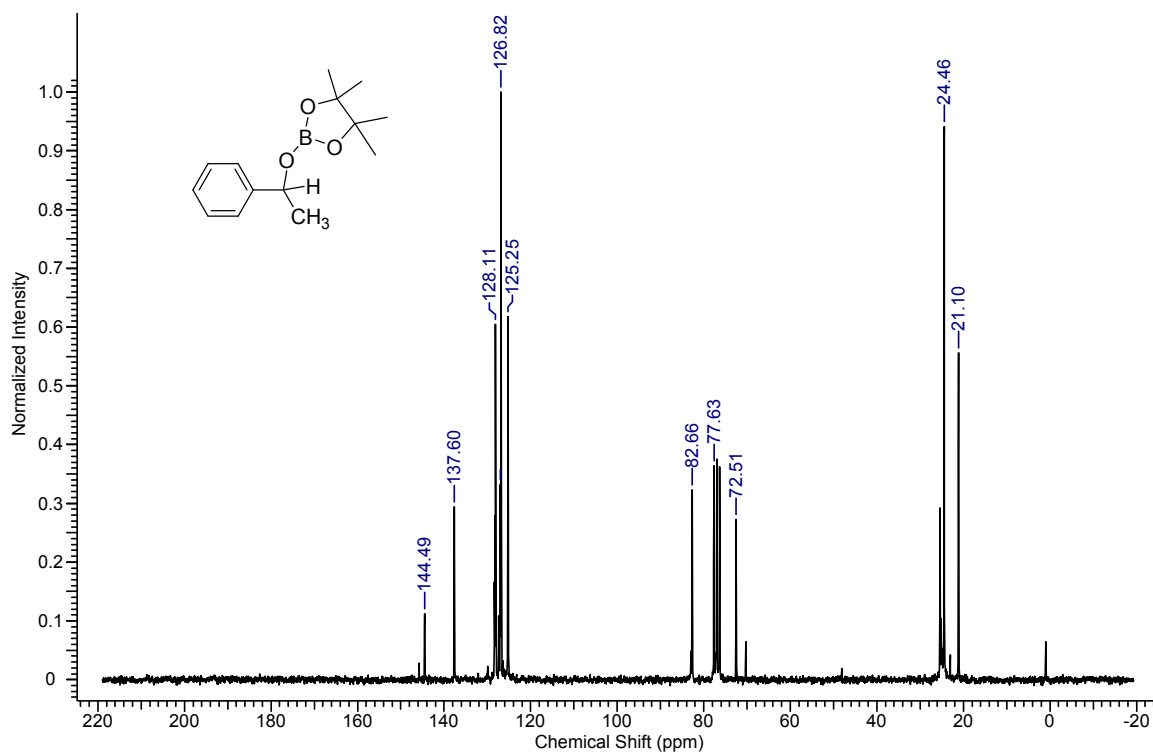

$^1\text{H}$  NMR of (4- $\text{CH}_3\text{Ph}$ )(Me)CHOBpin ( $\text{CDCl}_3$ , 200 MHz):

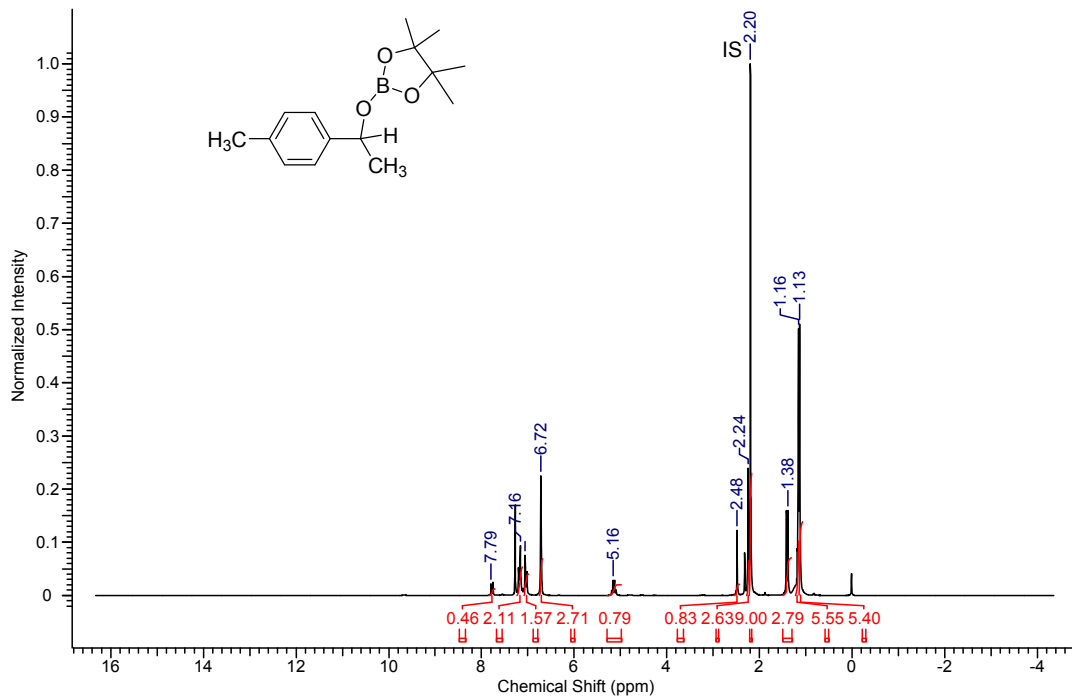

$^{13}\text{C}$  NMR of (4- $\text{CH}_3\text{Ph}$ )(Me)CHOBpin ( $\text{CDCl}_3$ , 50.28 MHz):

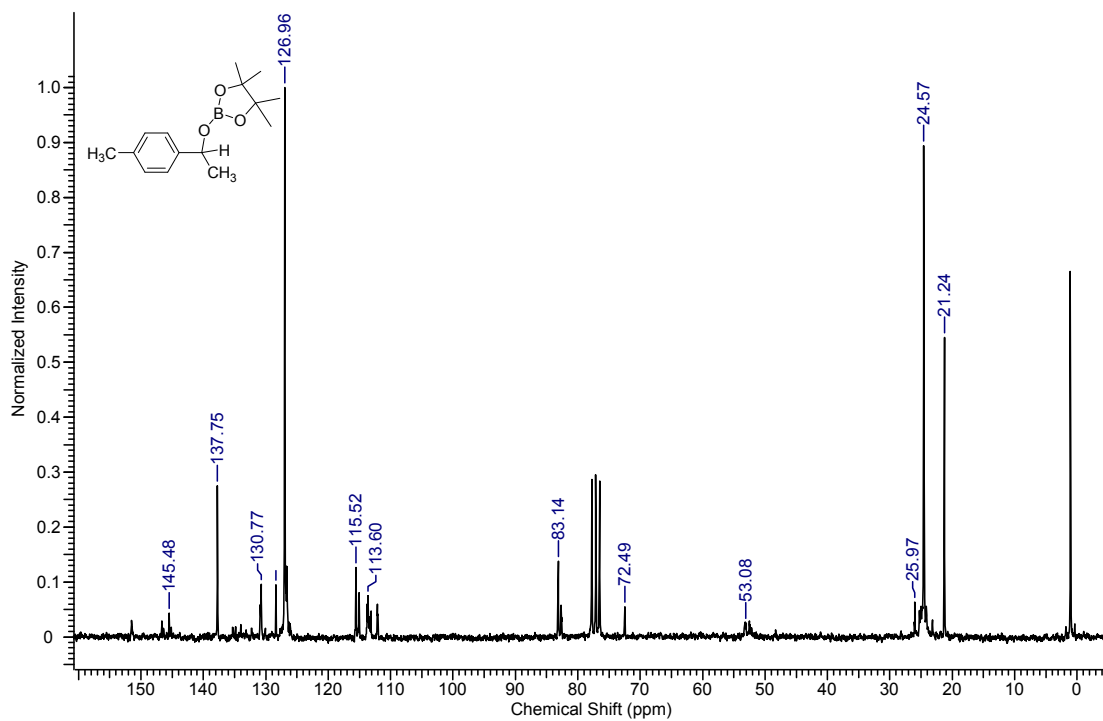

$^1\text{H}$  NMR of (4-OCH<sub>3</sub>Ph)(Me)CHOBpin (CDCl<sub>3</sub>, 200 MHz):

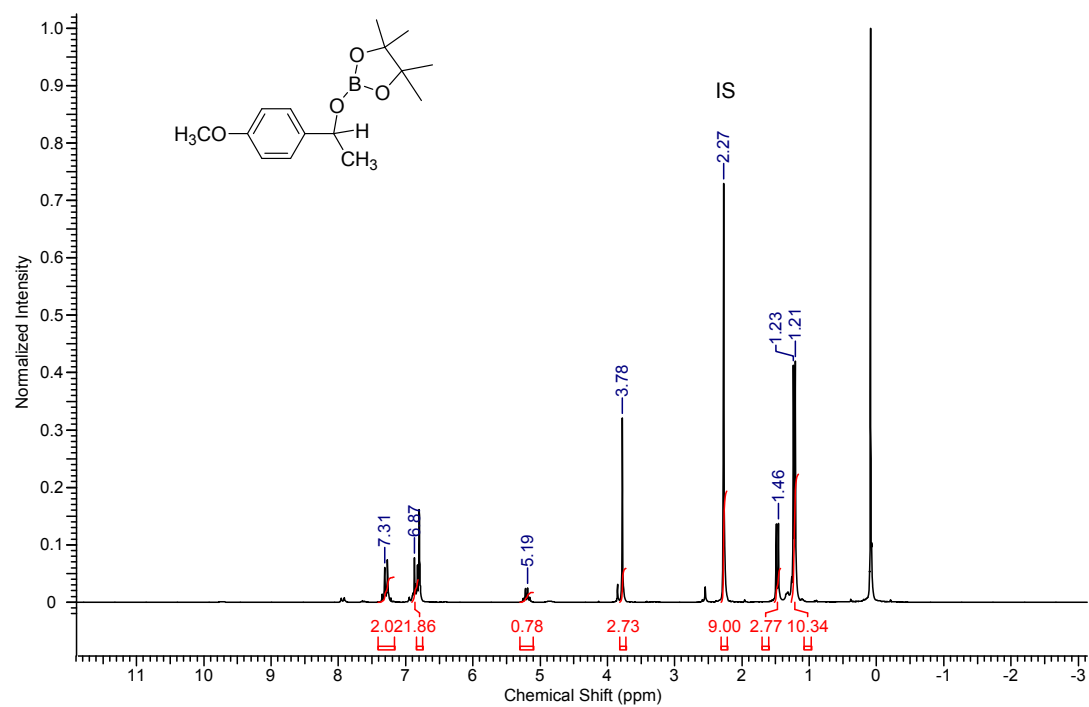

$^{13}\text{C}$  NMR of (4-OCH<sub>3</sub>Ph)(Me)CHOBpin (CDCl<sub>3</sub>, 50.28 MHz)

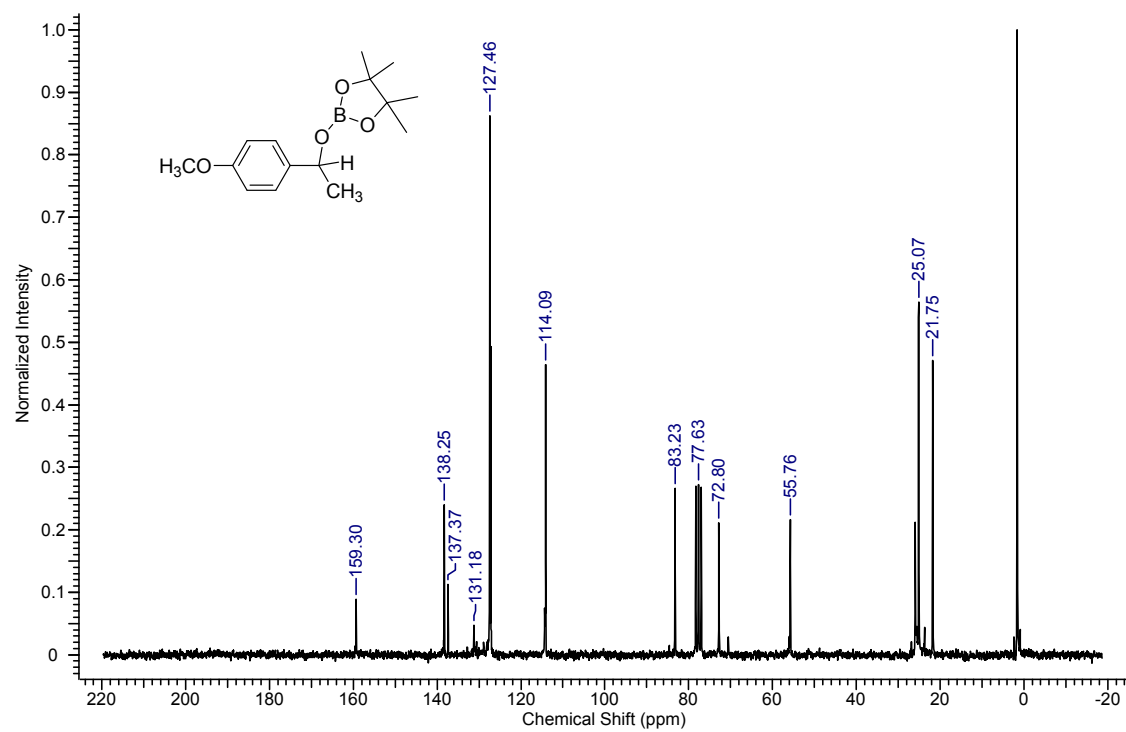

$^1\text{H}$  NMR of (4-NH<sub>2</sub>Ph)(Me)CHOBpin (CDCl<sub>3</sub>, 200 MHz):

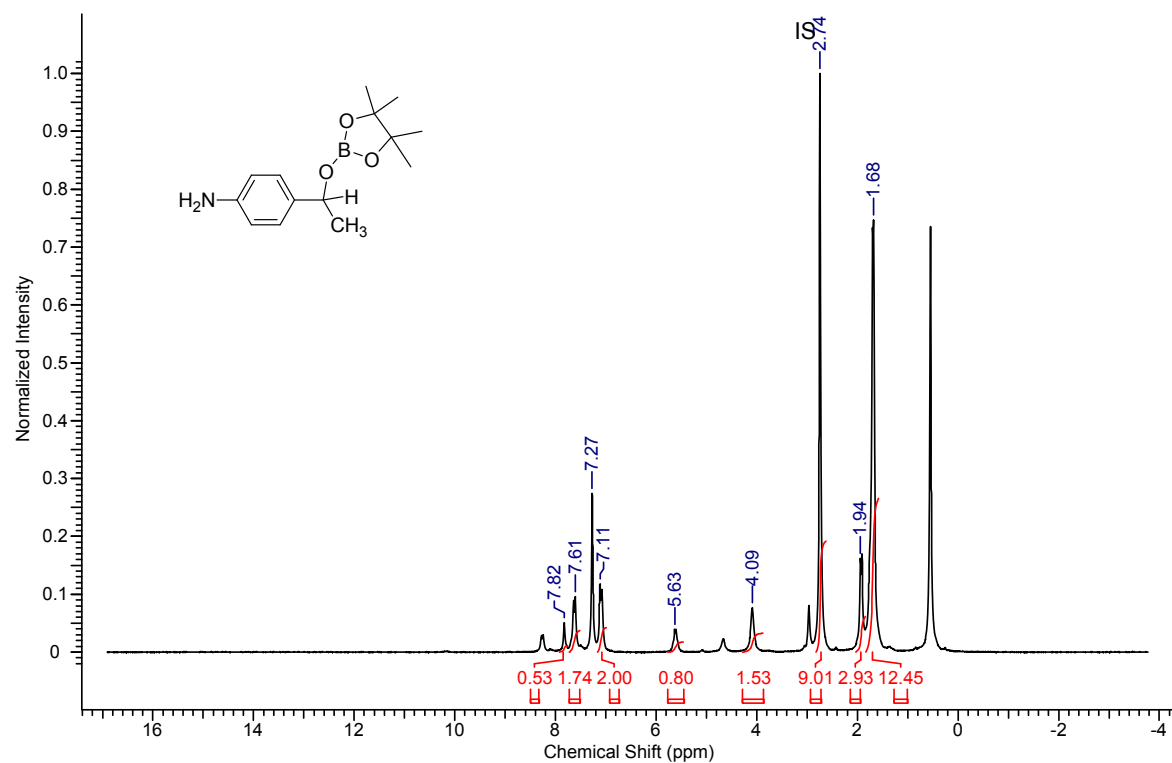

$^{13}\text{C}$  NMR of (4-NH<sub>2</sub>Ph)(Me)CHOBpin (CDCl<sub>3</sub>, 50.28 MHz):

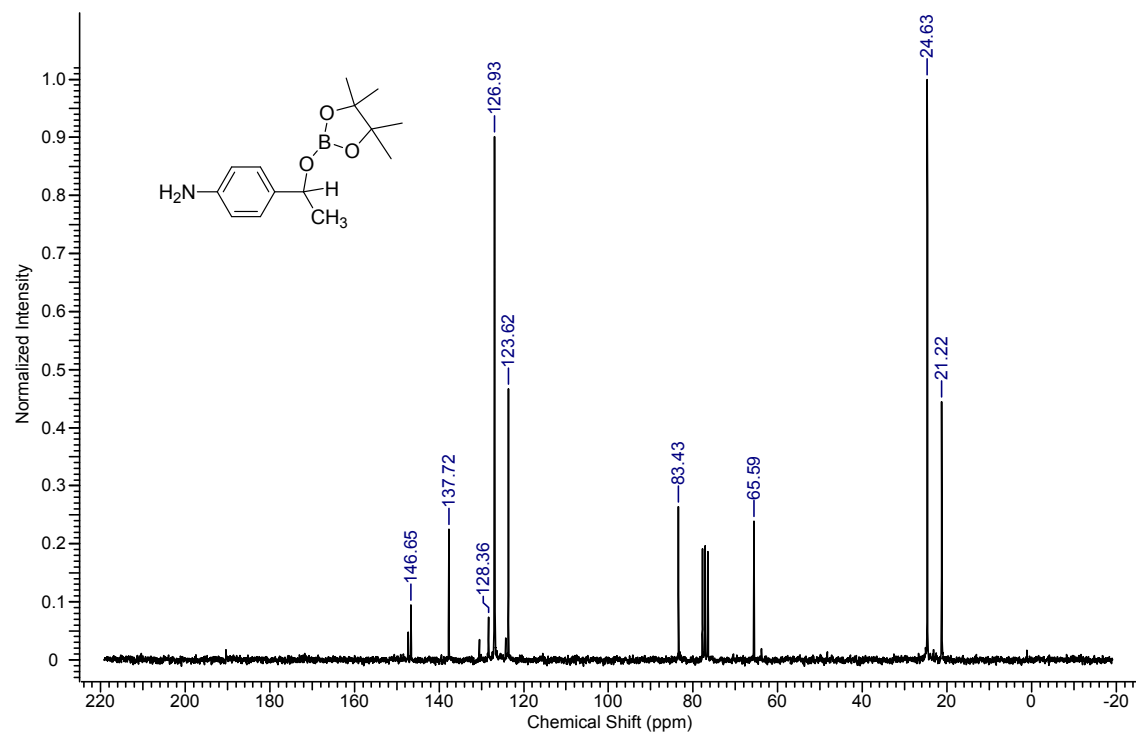



$^1\text{H}$  NMR of (4-NO<sub>2</sub>Ph)(Me)CHOBpin (CDCl<sub>3</sub>, 200 MHz):

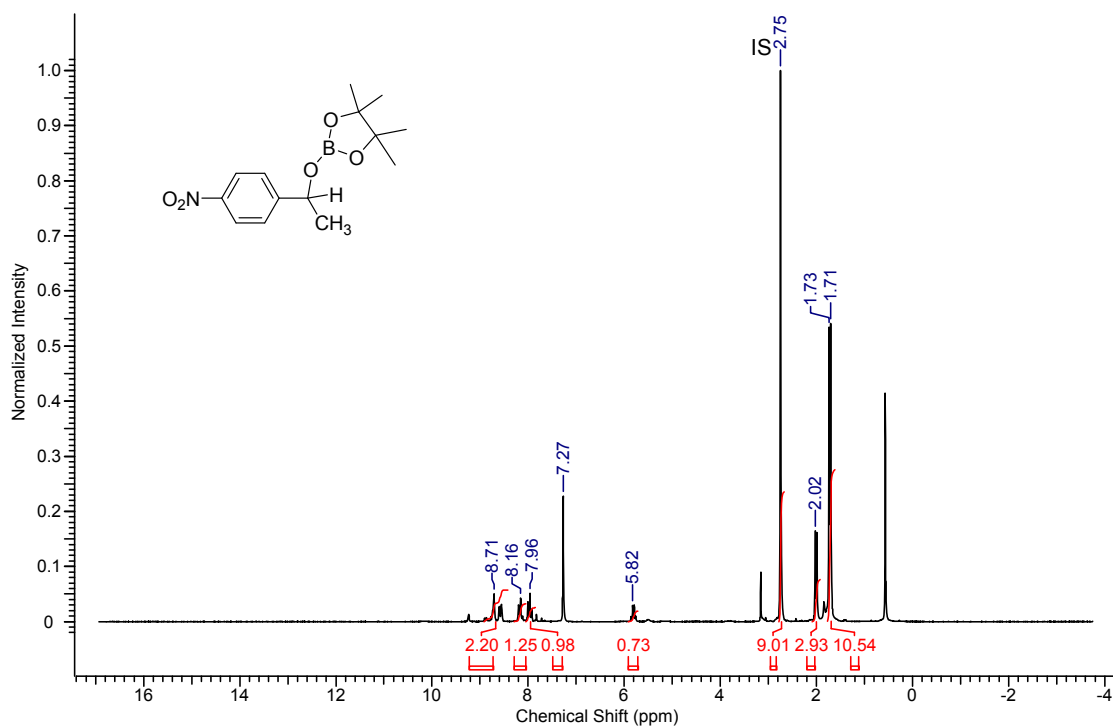

$^{13}\text{C}$  NMR of (4-NO<sub>2</sub>Ph)(Me)CHOBpin (CDCl<sub>3</sub>, 50.28 MHz):

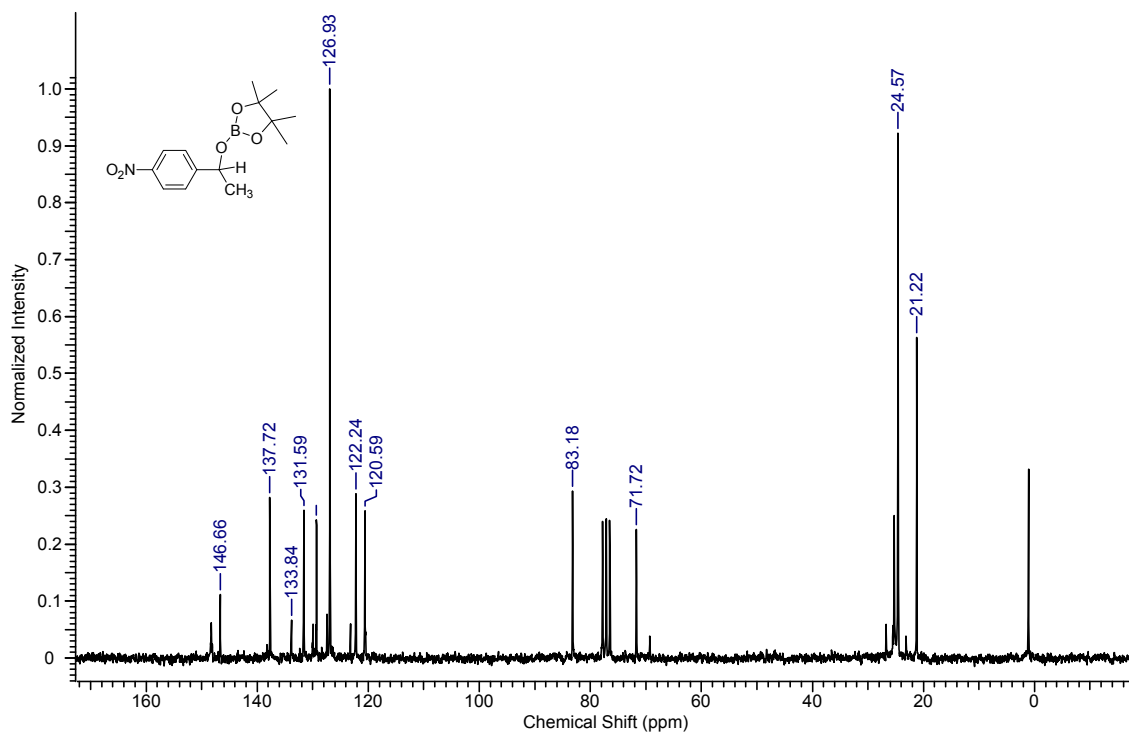

$^1\text{H}$  NMR of (4-BrPh)(Me)CHOBpin ( $\text{CDCl}_3$ , 200 MHz):

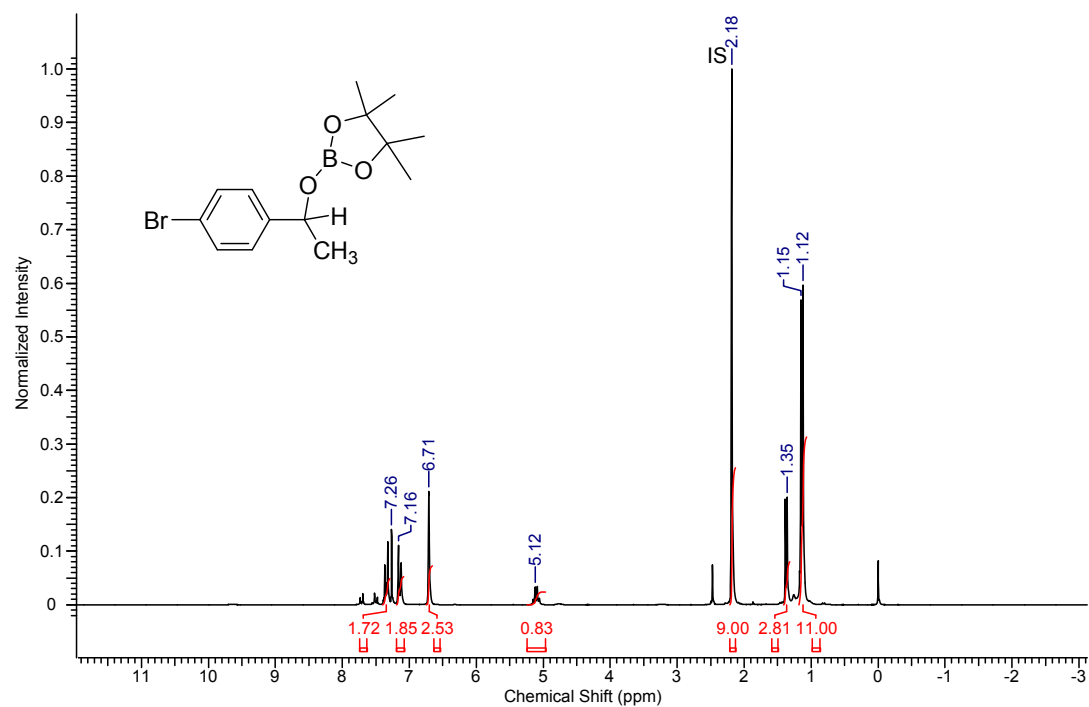

$^{13}\text{C}$  NMR of (4-BrPh)(Me)CHOBpin ( $\text{CDCl}_3$ , 50.28 MHz):

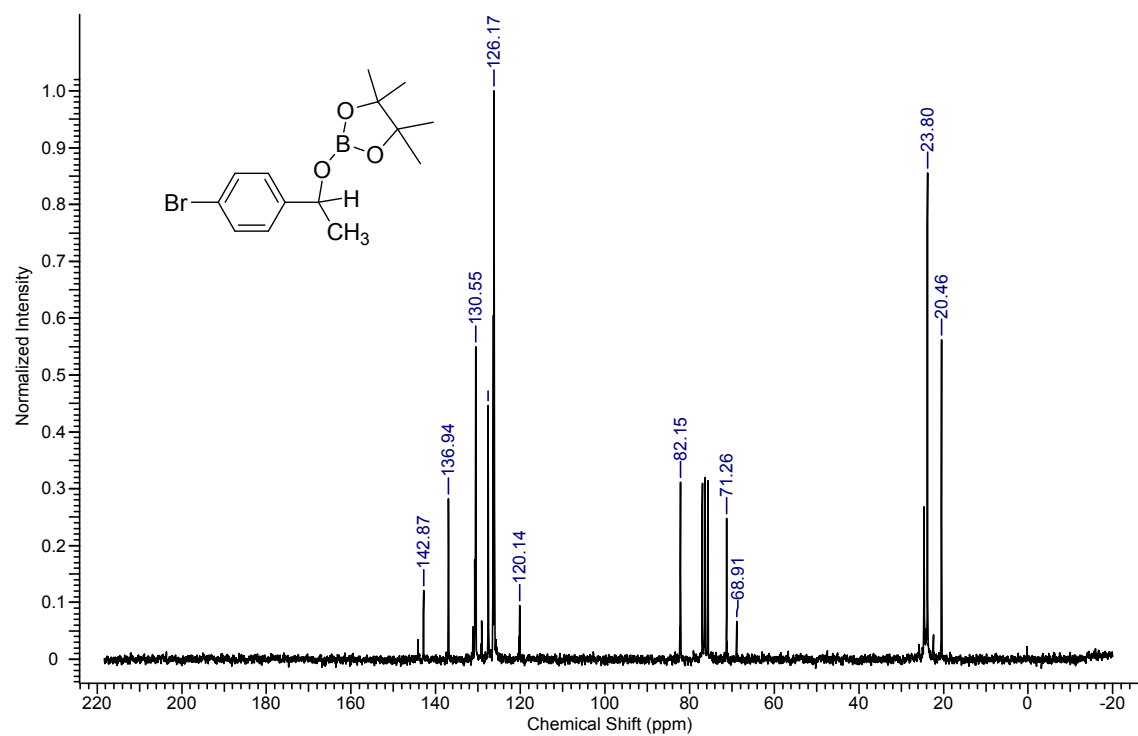

$^1\text{H}$  NMR of (2-ClEt)(Me)CHOBpin( $\text{CDCl}_3$ , 200 MHz):

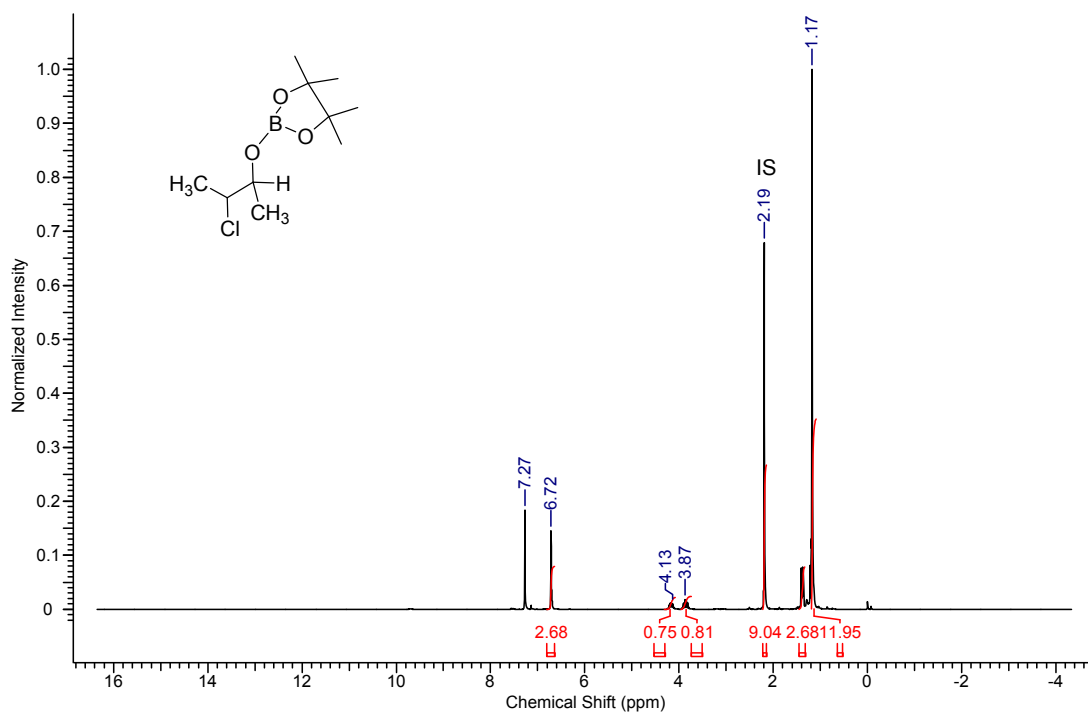

$^{13}\text{C}$  NMR of (2-ClEt)(Me)CHOBpin( $\text{CDCl}_3$ , 50.28 MHz):

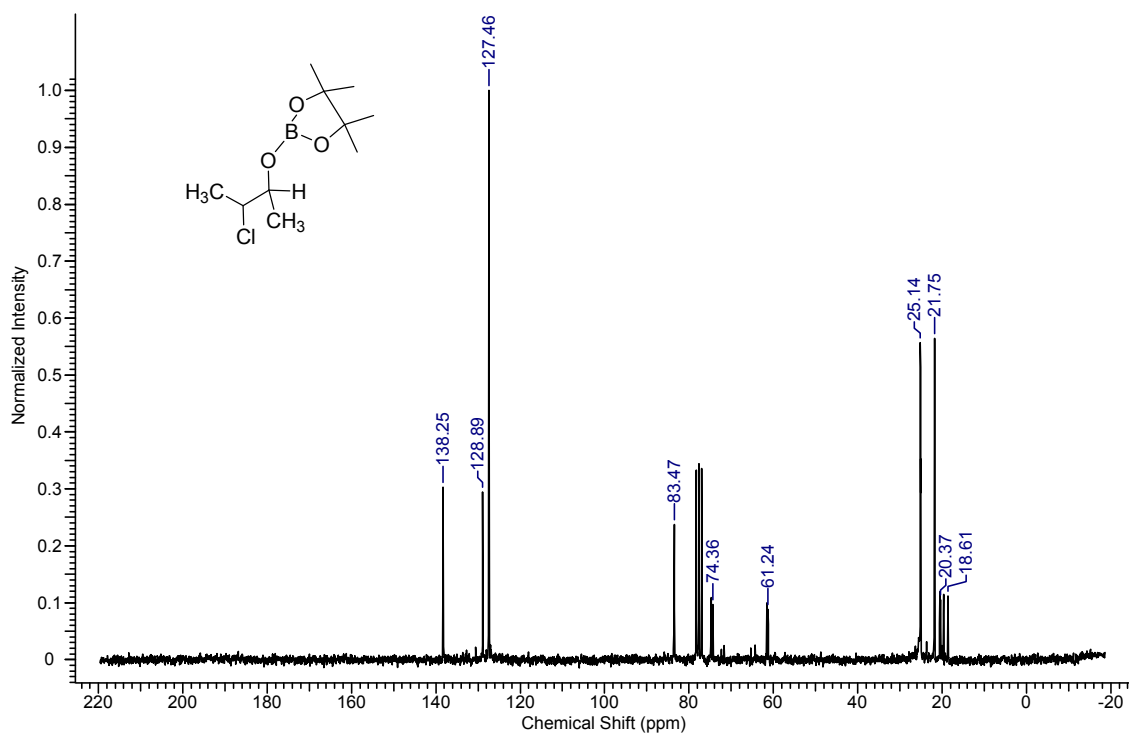

$^1\text{H}$  NMR of (4-OH $\text{Et}$ )(Me)CHOBpin( $\text{CDCl}_3$ , 200 MHz):

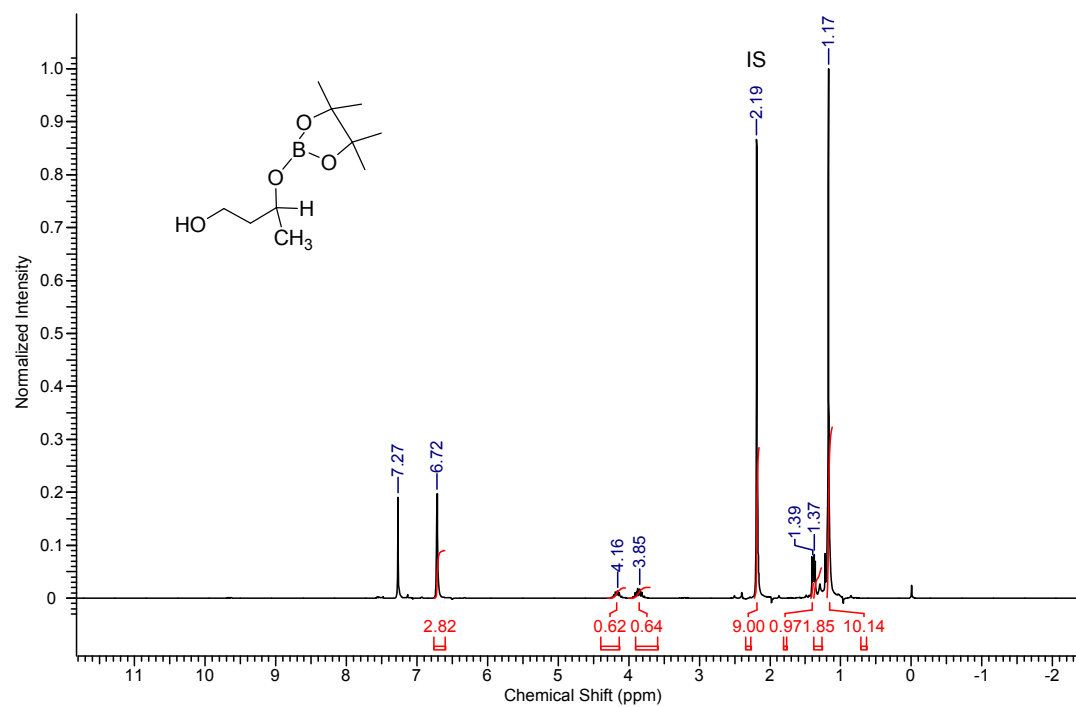

$^{13}\text{C}$  NMR of (4-OH $\text{Et}$ )(Me)CHOBpin( $\text{CDCl}_3$ , 50.28 MHz):

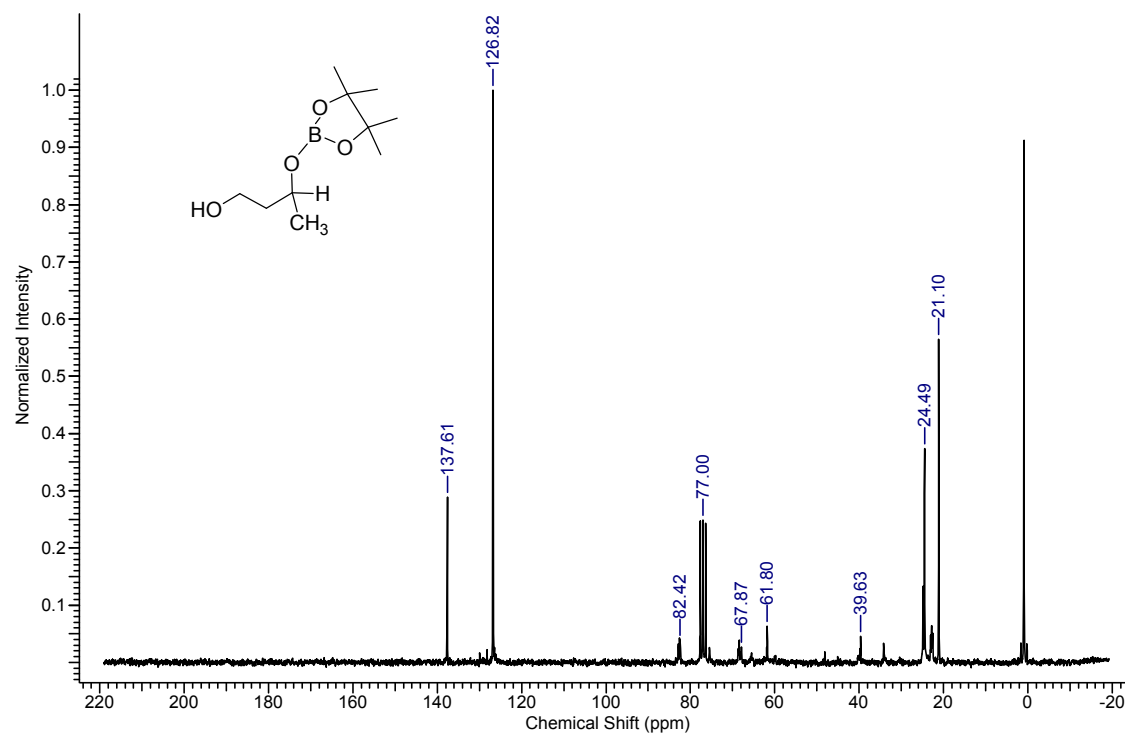

$^1\text{H}$  NMR of (Et)(Me)CHOBpin ( $\text{CDCl}_3$ , 200 MHz):

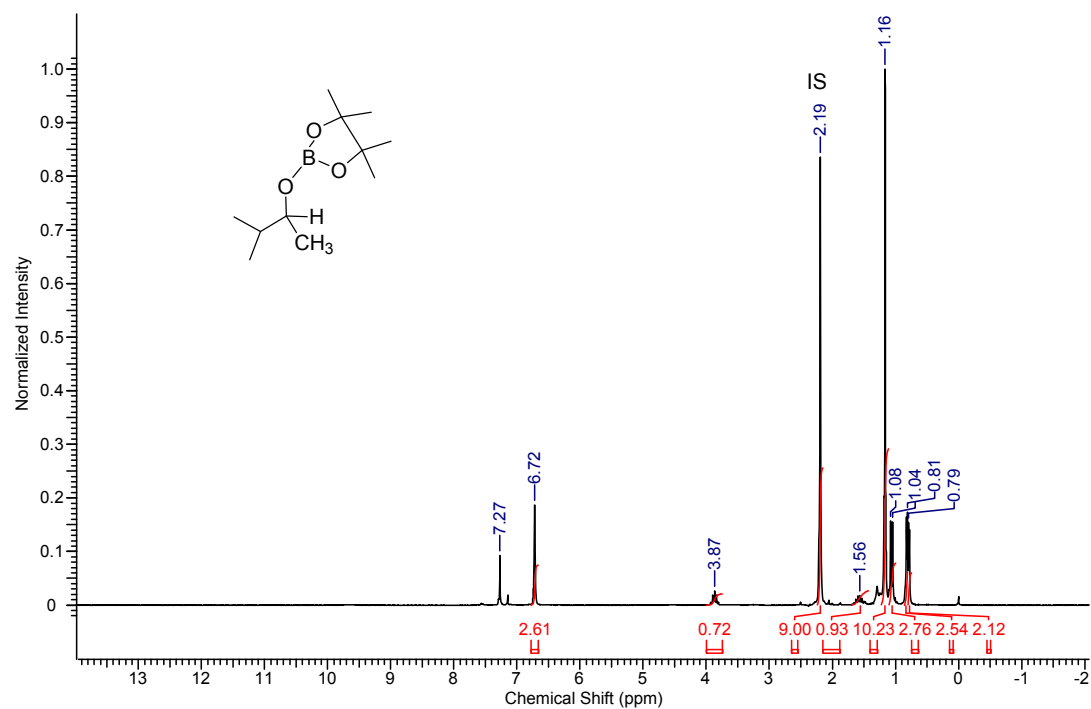

$^{13}\text{C}$  NMR of (Et)(Me)CHOBpin ( $\text{CDCl}_3$ , 50.28 MHz):

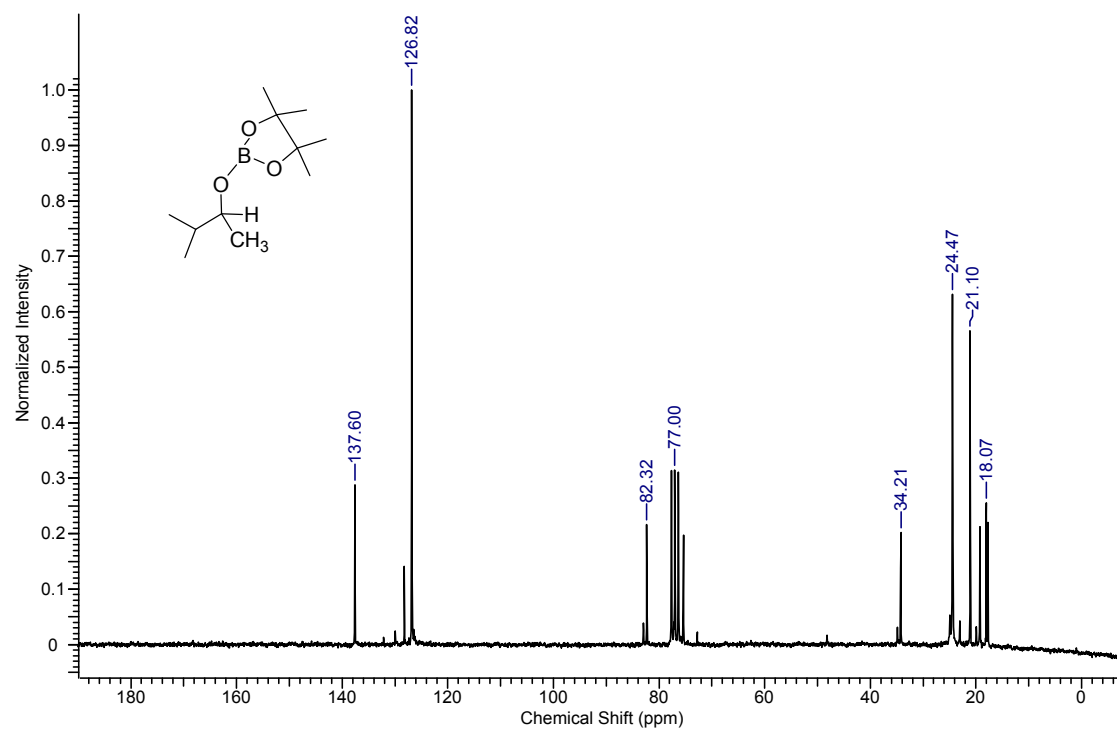

$^1\text{H}$  NMR of (Ph)(Ph)CHOBpin ( $\text{CDCl}_3$ , 200 MHz):

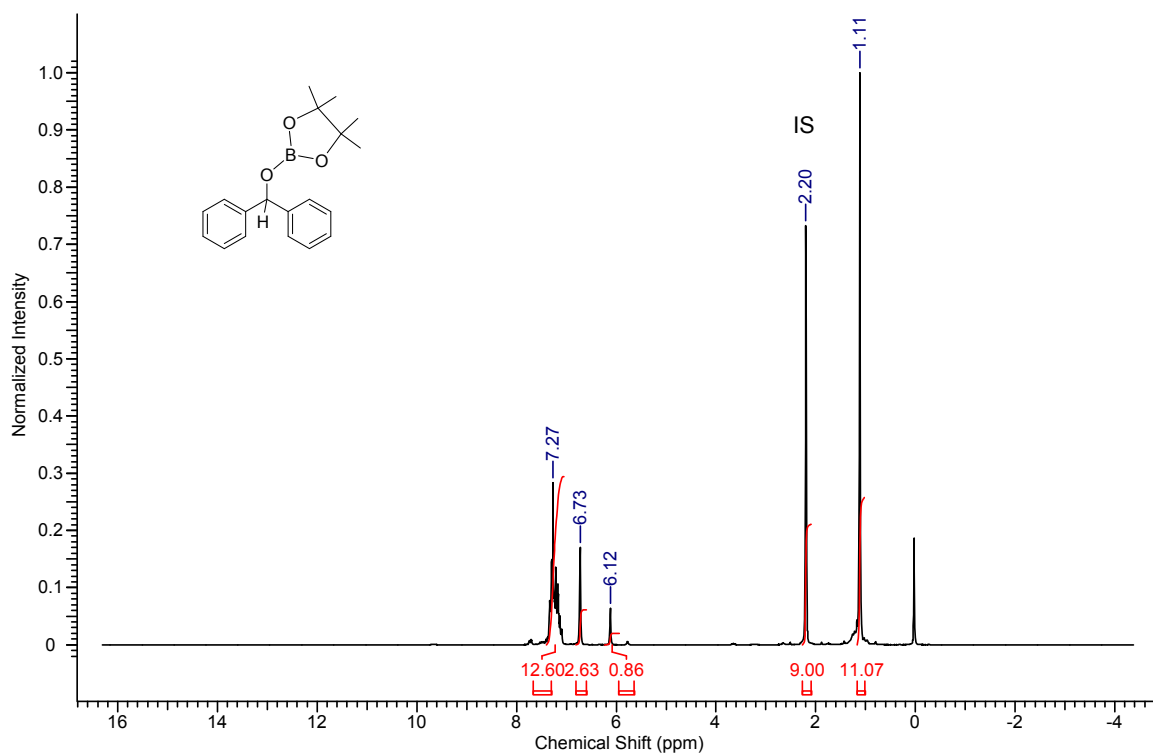

$^{13}\text{C}$  NMR of (Ph)(Ph)CHOBpin ( $\text{CDCl}_3$ , 50.28 MHz):

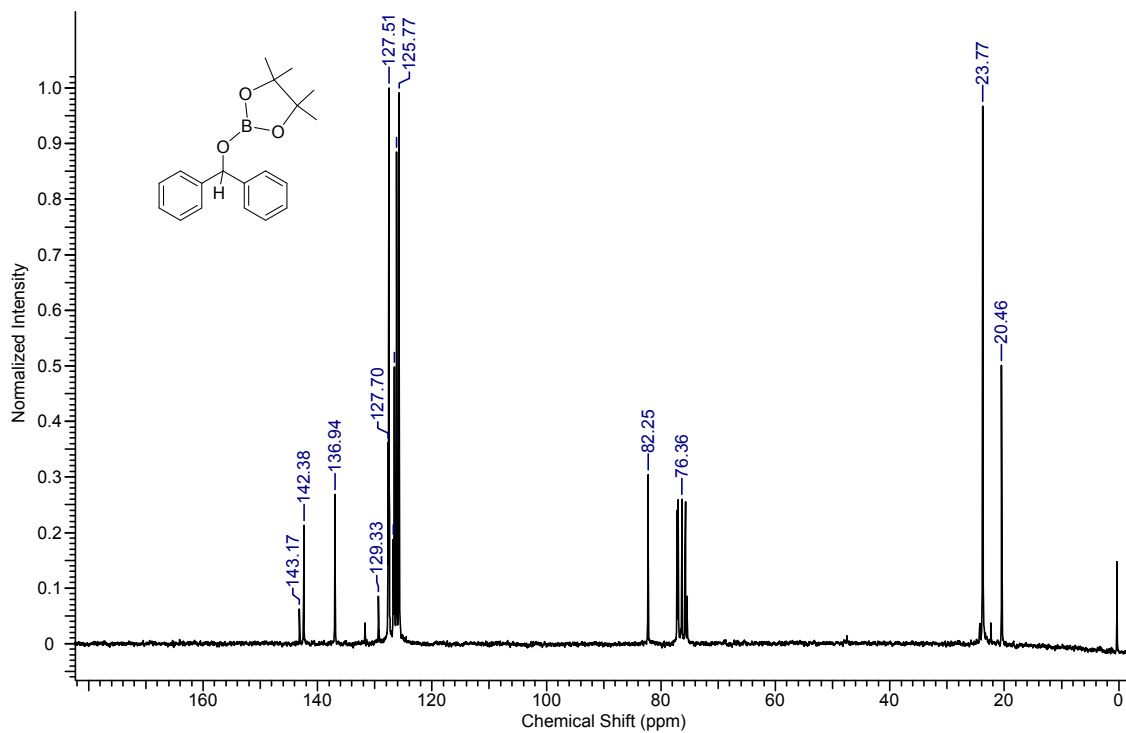

## 10. Chemoselective hydroboration of aldehydes versus ketones:

1 Equivalent of benzaldehyde and 1 equivalent of acetophenone were charged in Schlenk tube with catalyst and 1 equivalent of HBPin, it led to almost quantitative hydroboration of benzaldehyde and complete recycle of acetophenone. Subsequent addition of a second equivalent of HBpin afforded both hydroborated products in more than 90% yield.

### A. 1 Eq. PhCHO + 1 Eq. PhCOCH<sub>3</sub> + 1 Eq. HBPin + Catalyst

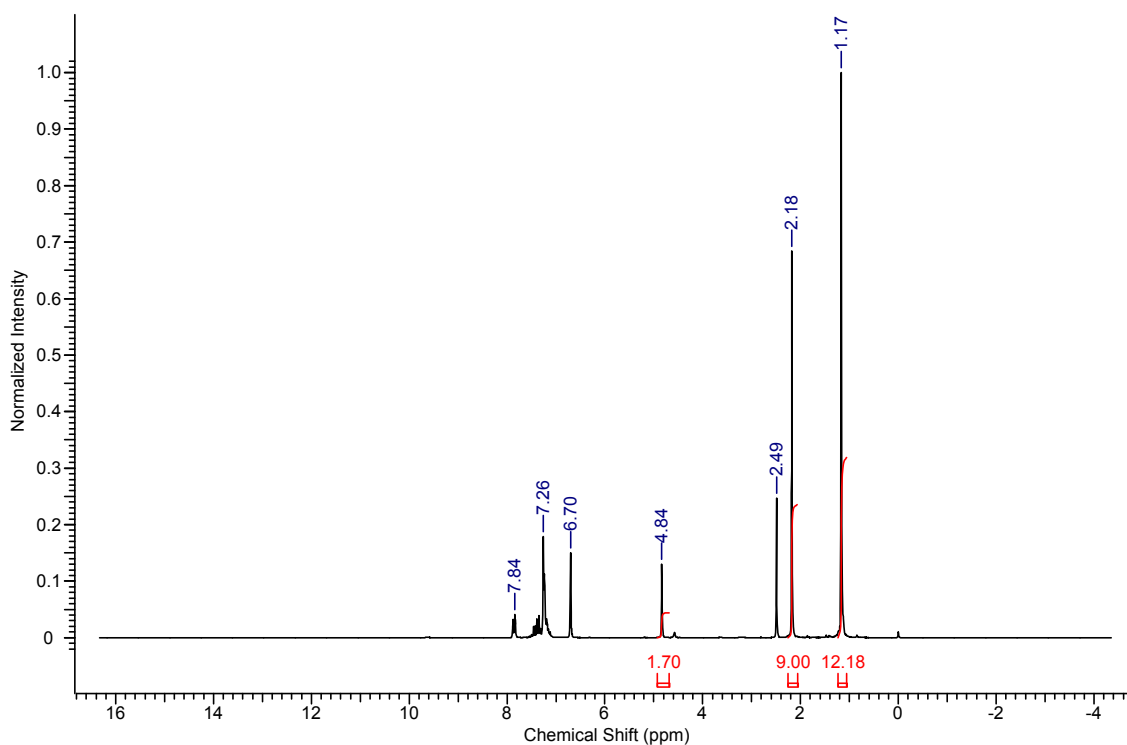

**B. 1 Eq. PhCHO + 1 Eq. PhCOCH<sub>3</sub> + 2 Eq. HBPin + Catalyst**

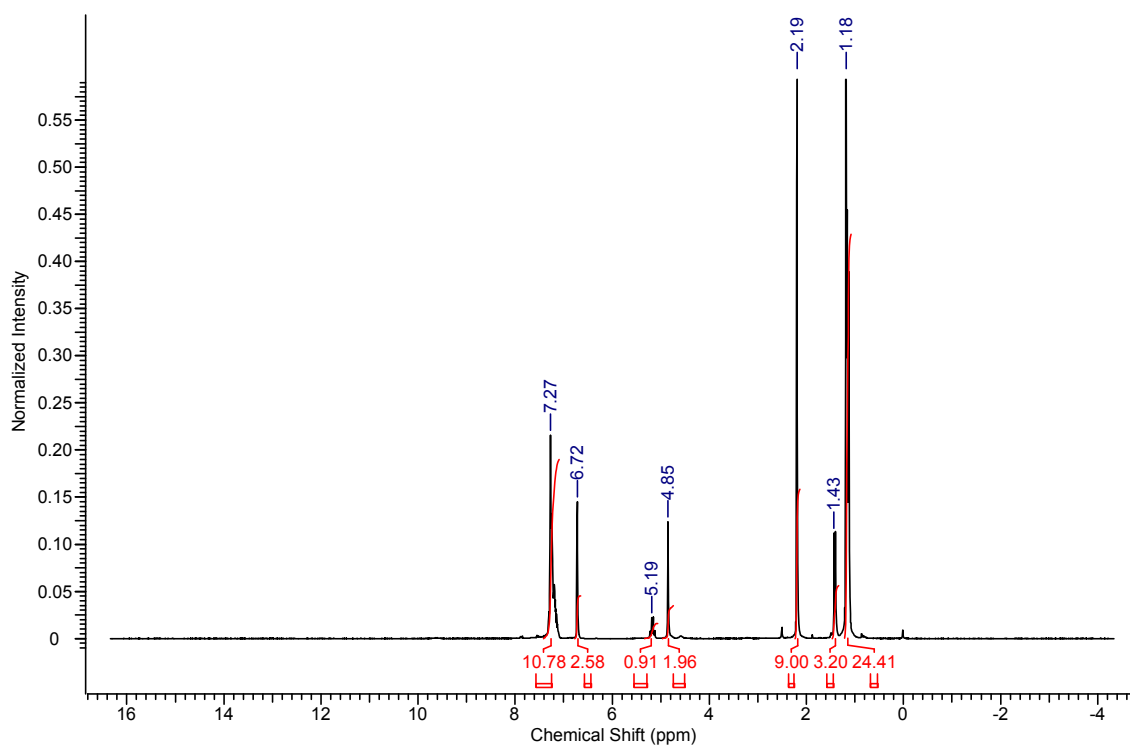

**11. References**

1. S. Yadav, V.S. V. S. N. Swamy, R. Gonnade and S. S. Sen, *ChemistrySelect*, 2016, **1**, 1066-1071.
